# Supplementary figures and images for: Nickel-catalyzed C–P cross-coupling of diphenylphosphine oxide with aryl chlorides
Source: Royal Society of Chemistry journal article supplement (doi:10.1039/c2ob26874d), 2012-01-01

## NMR Charts

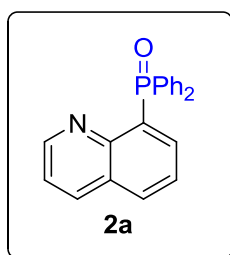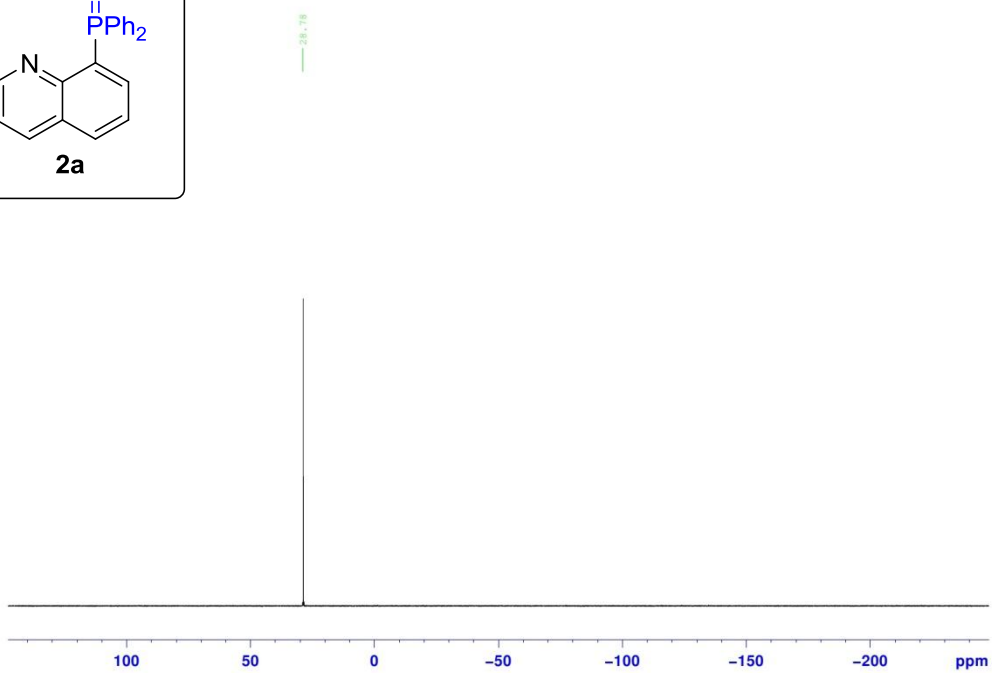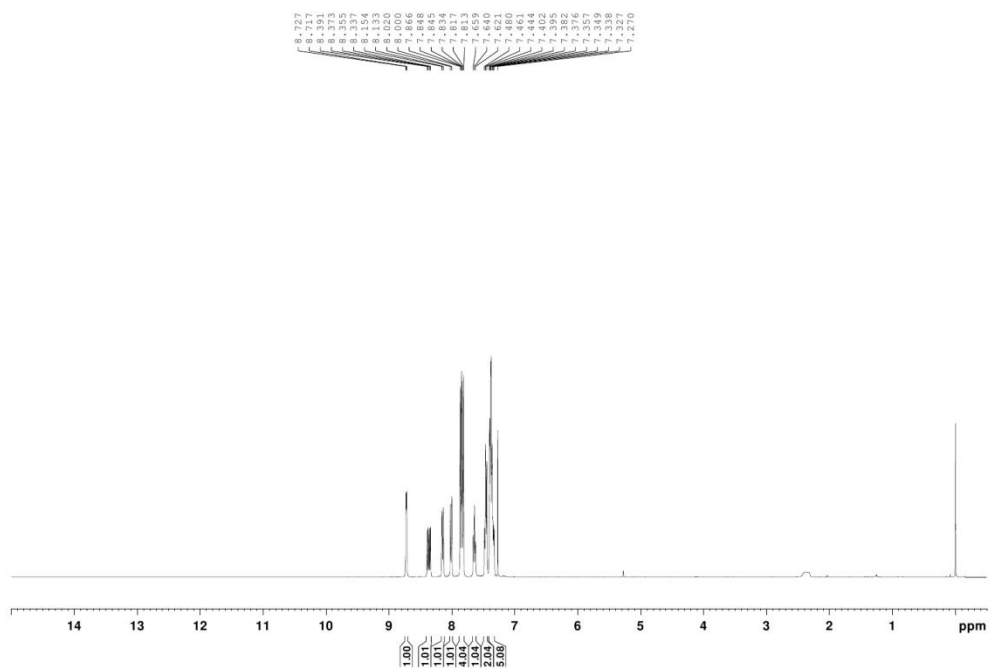

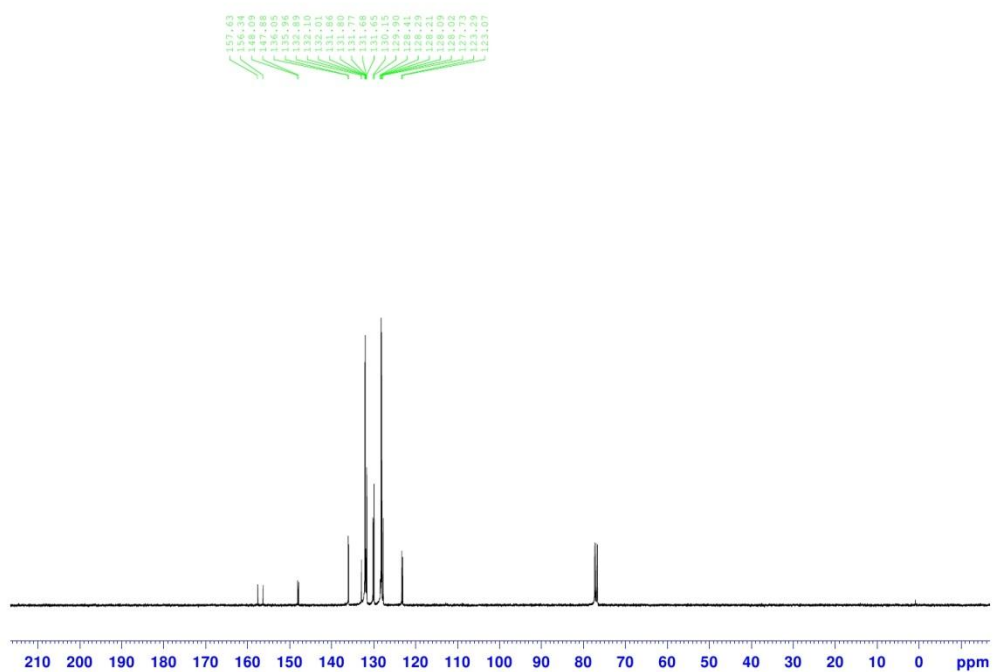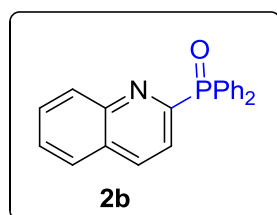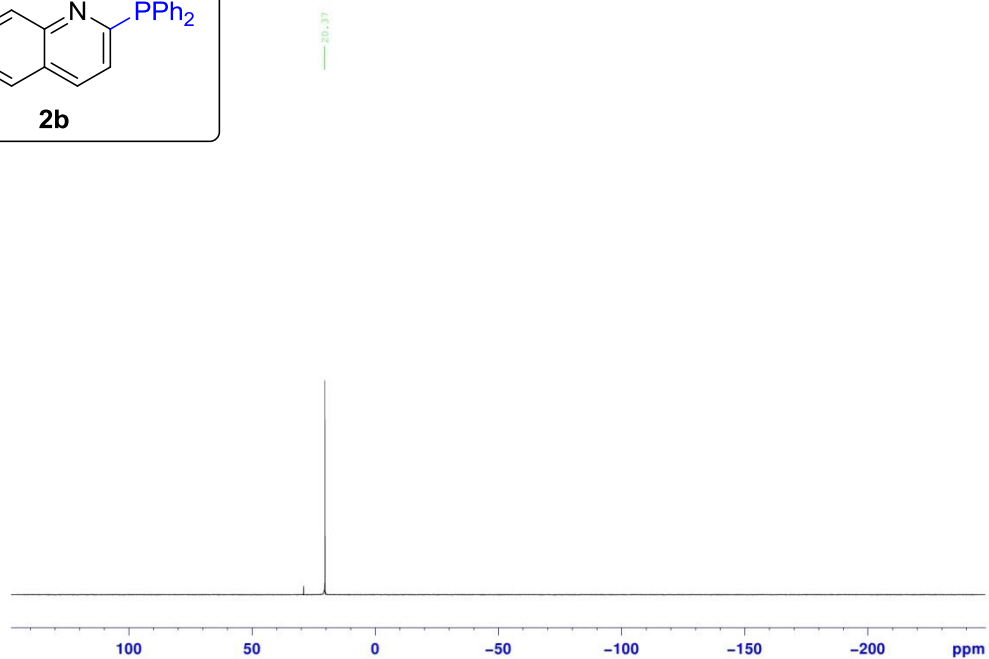

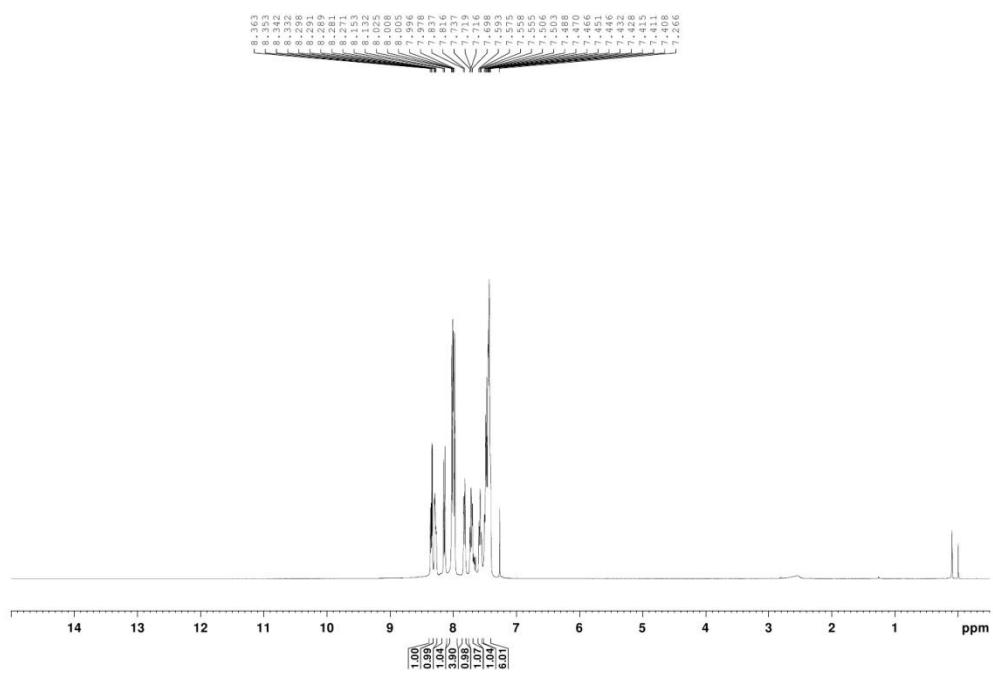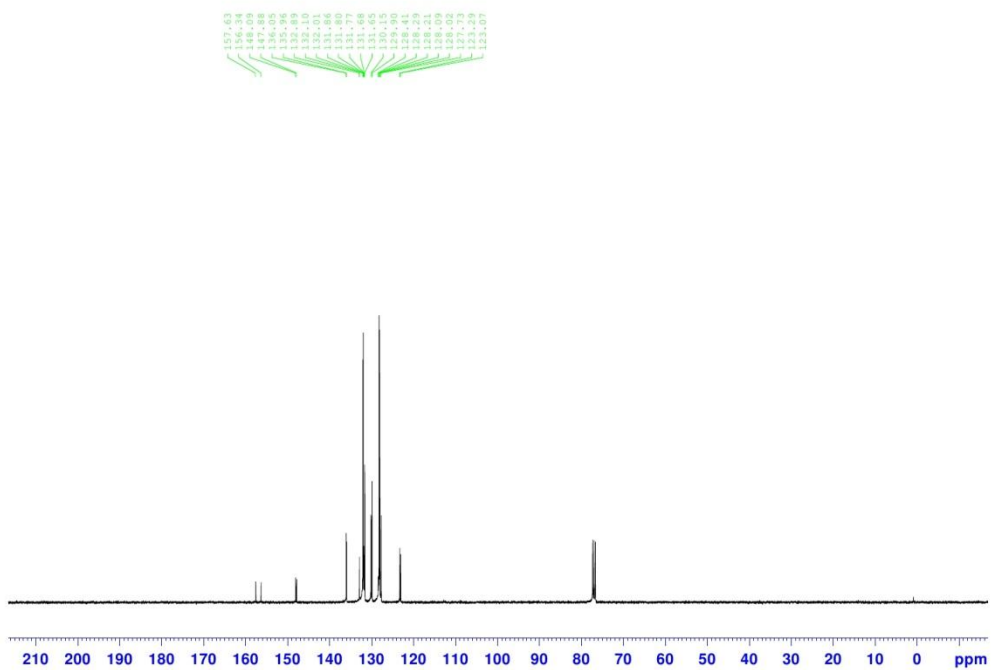

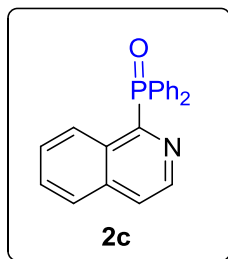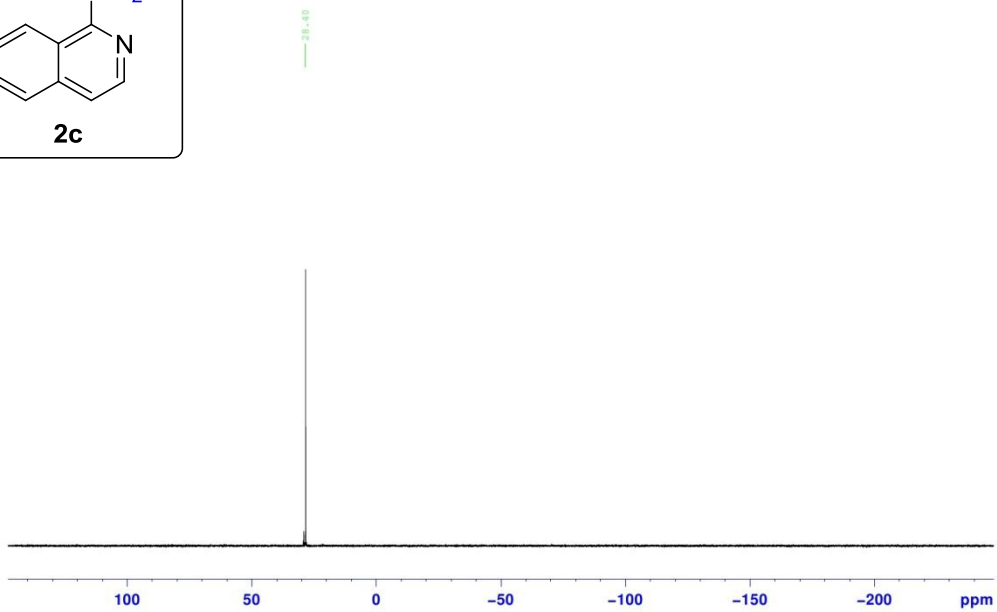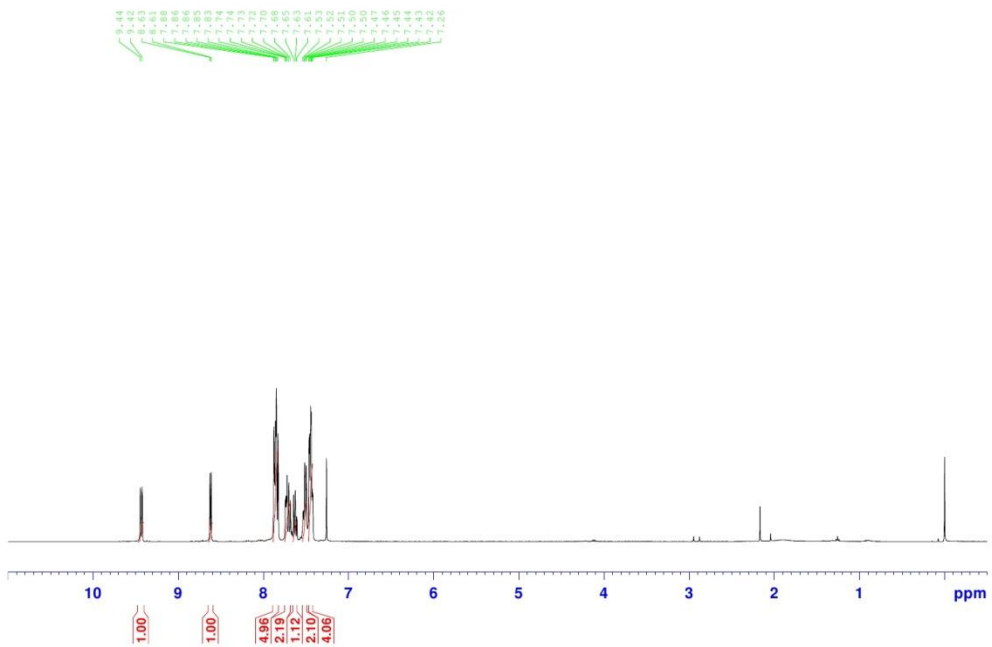

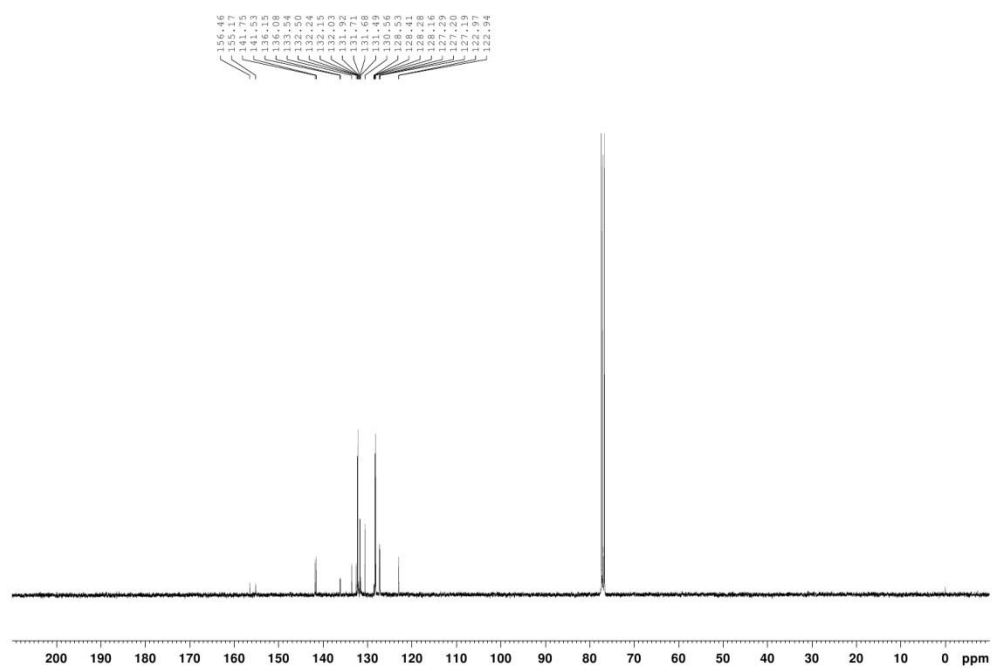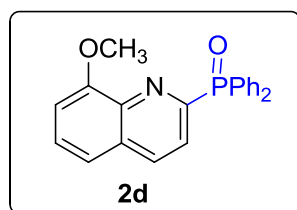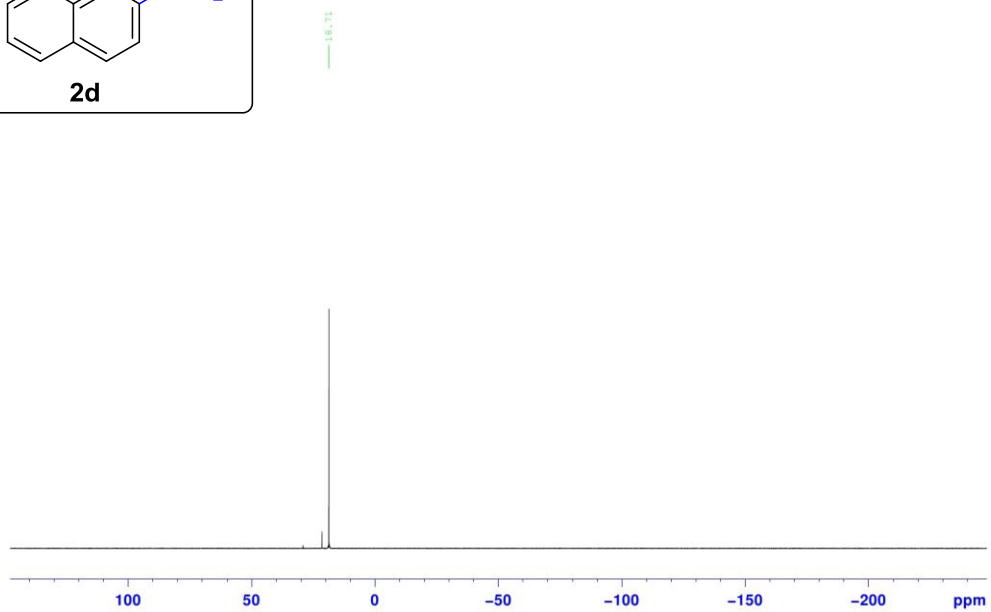

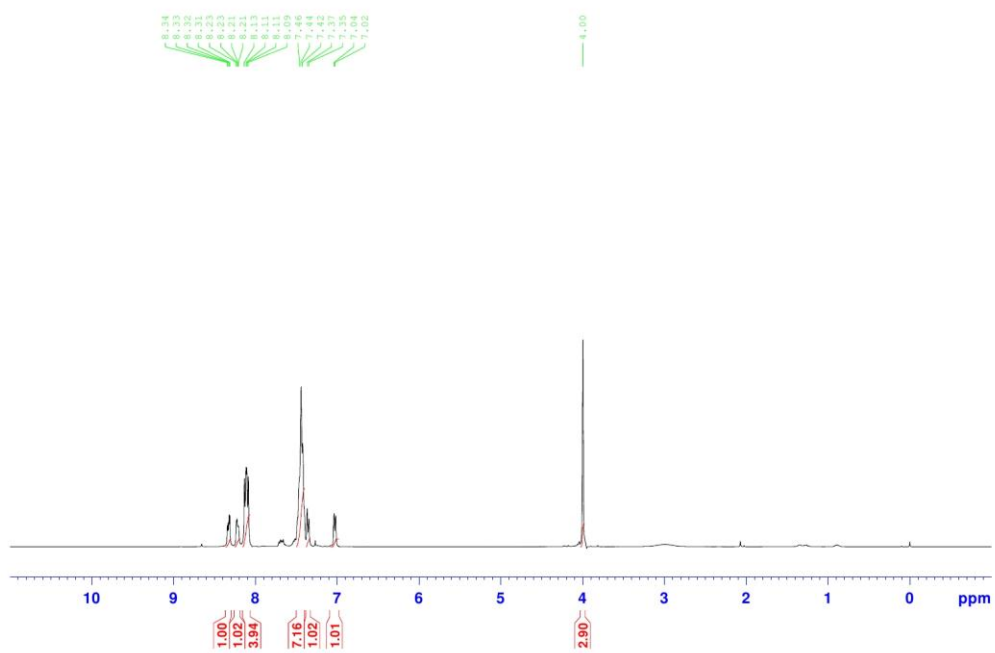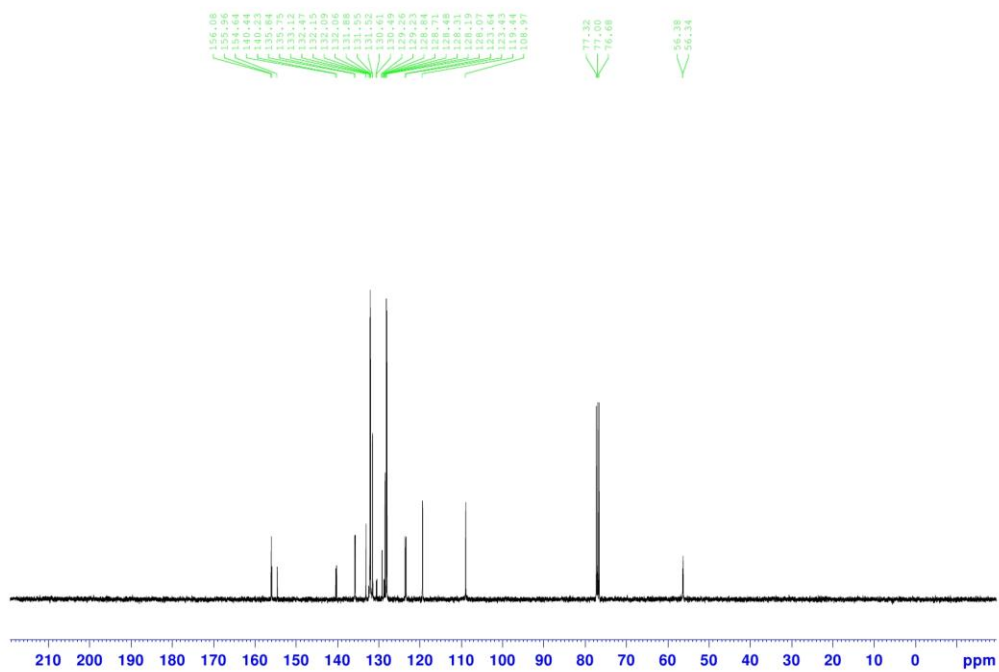

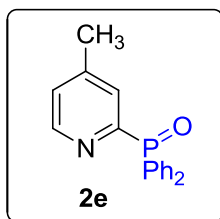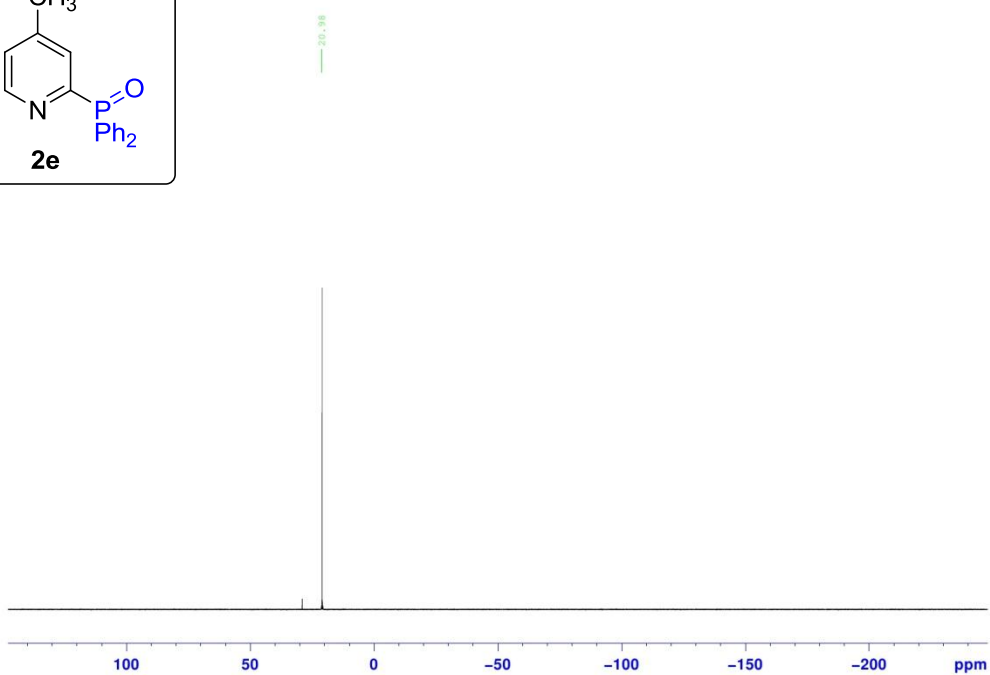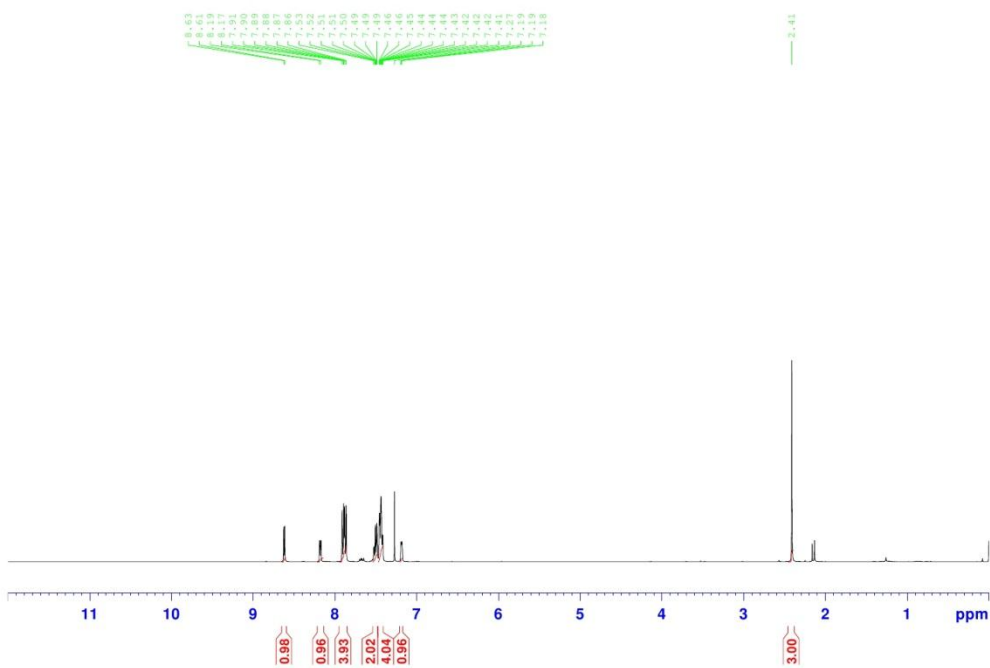

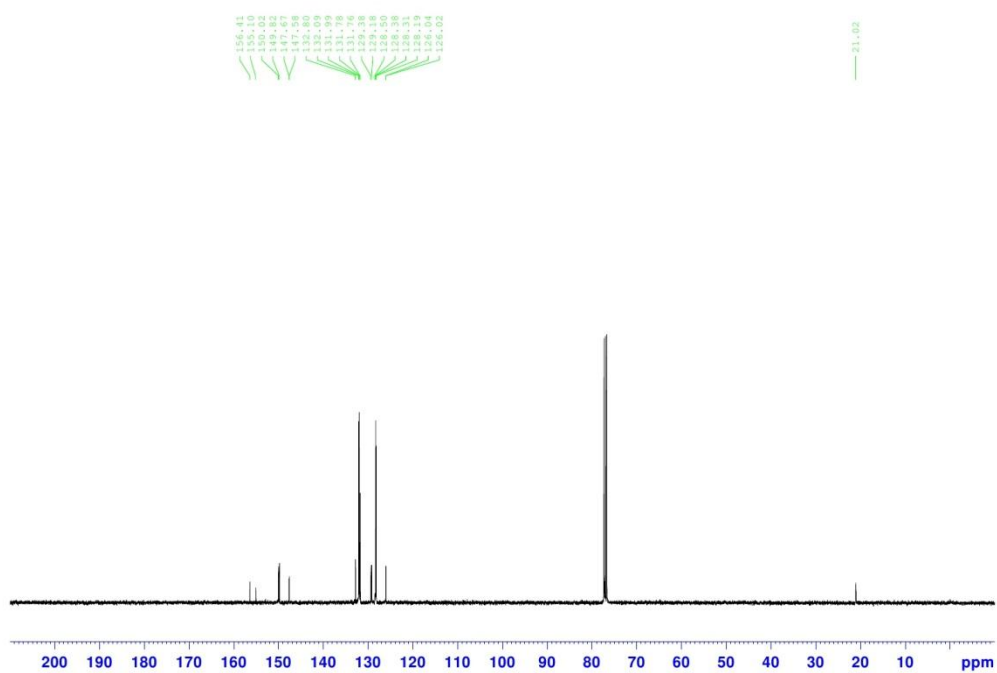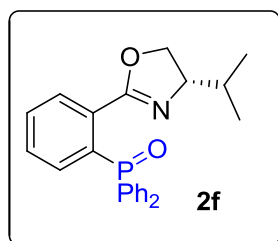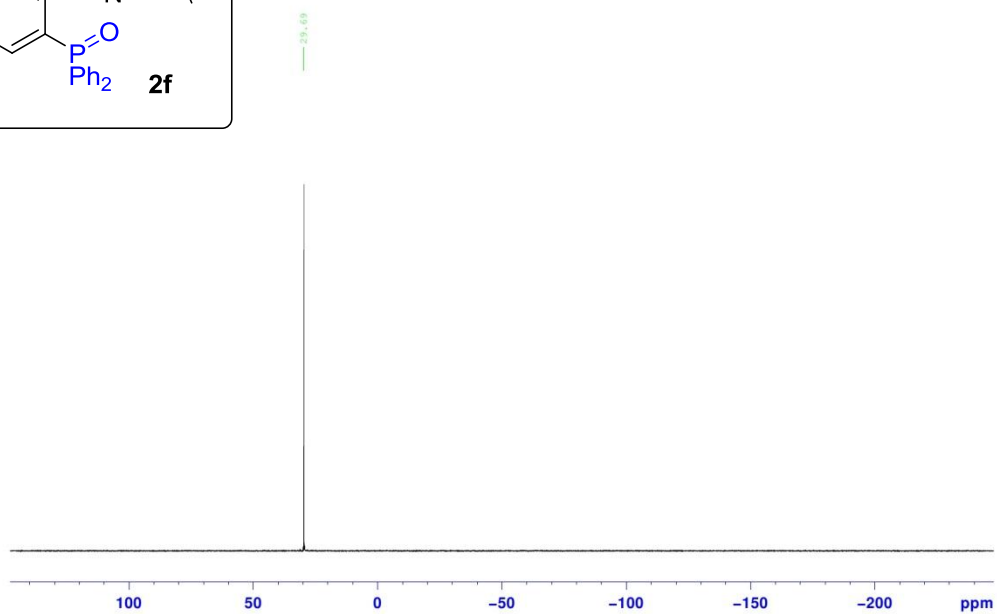





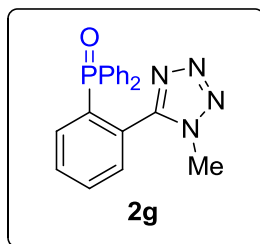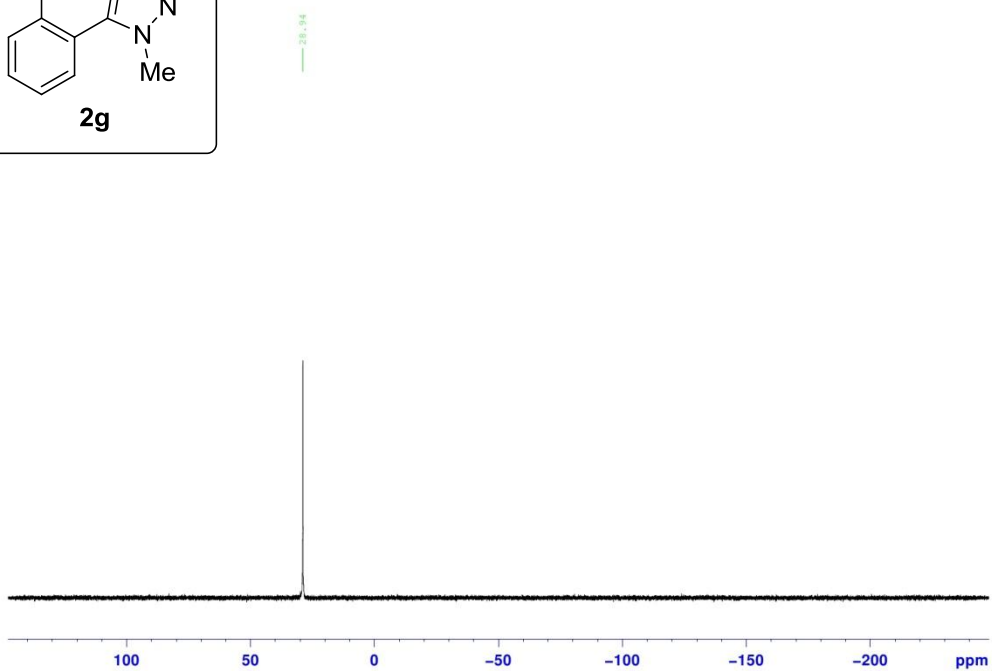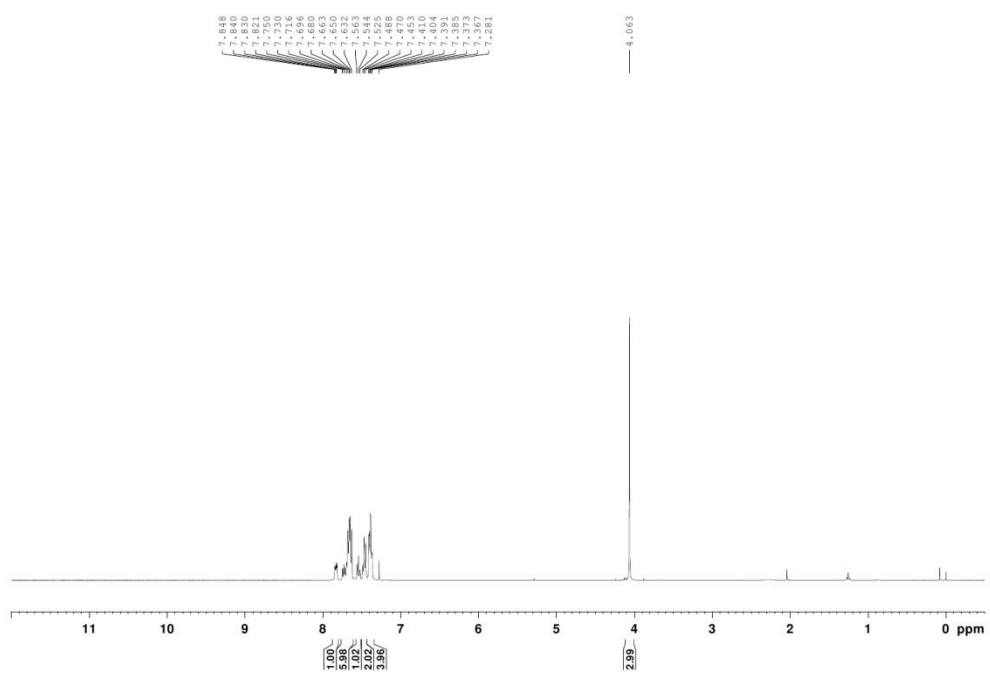

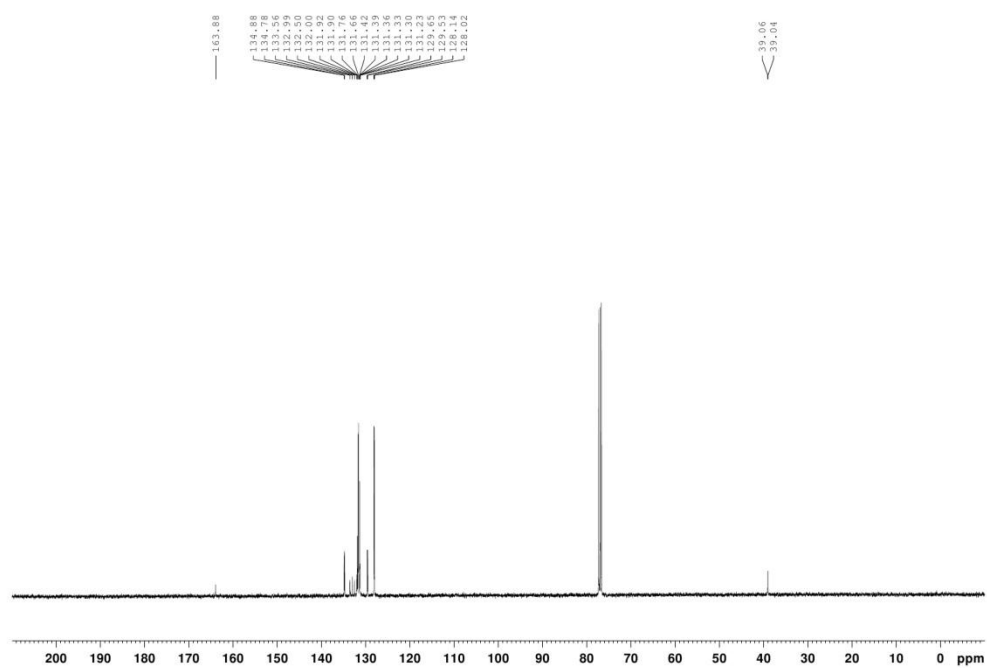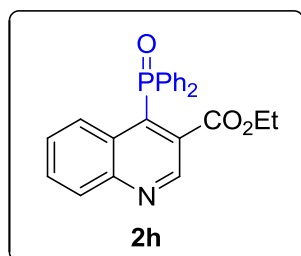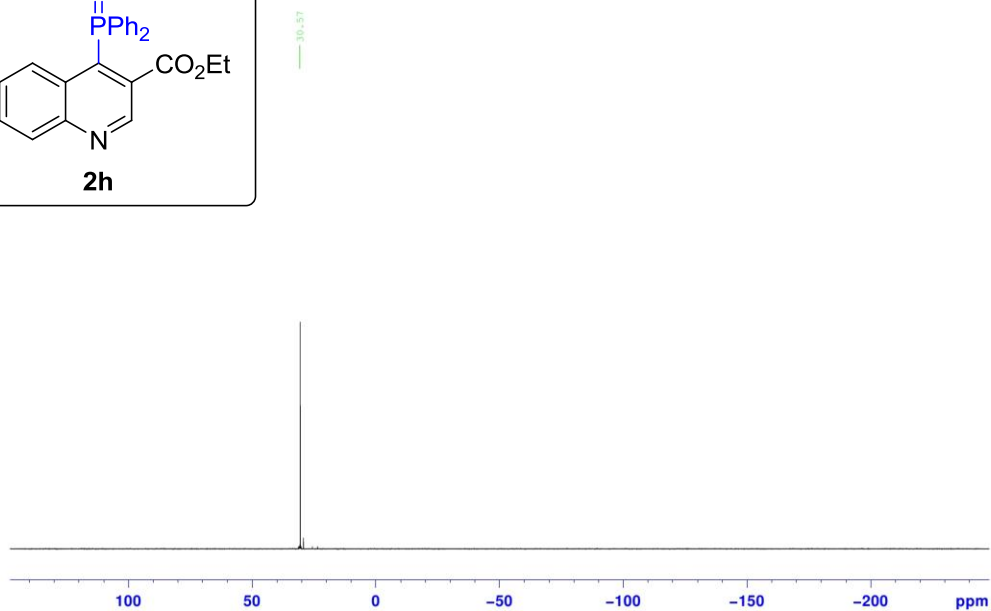

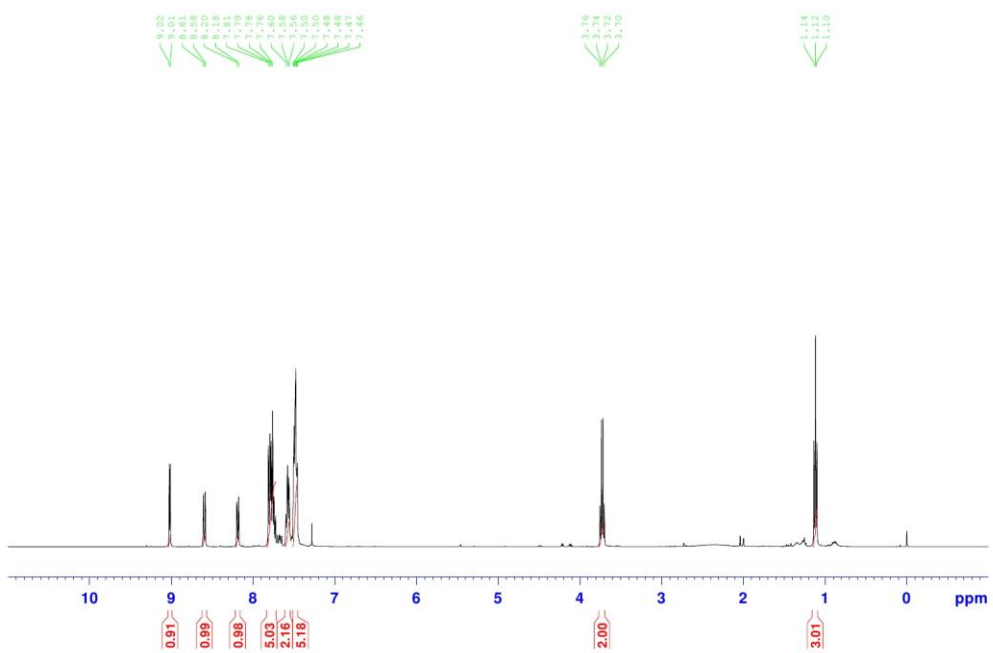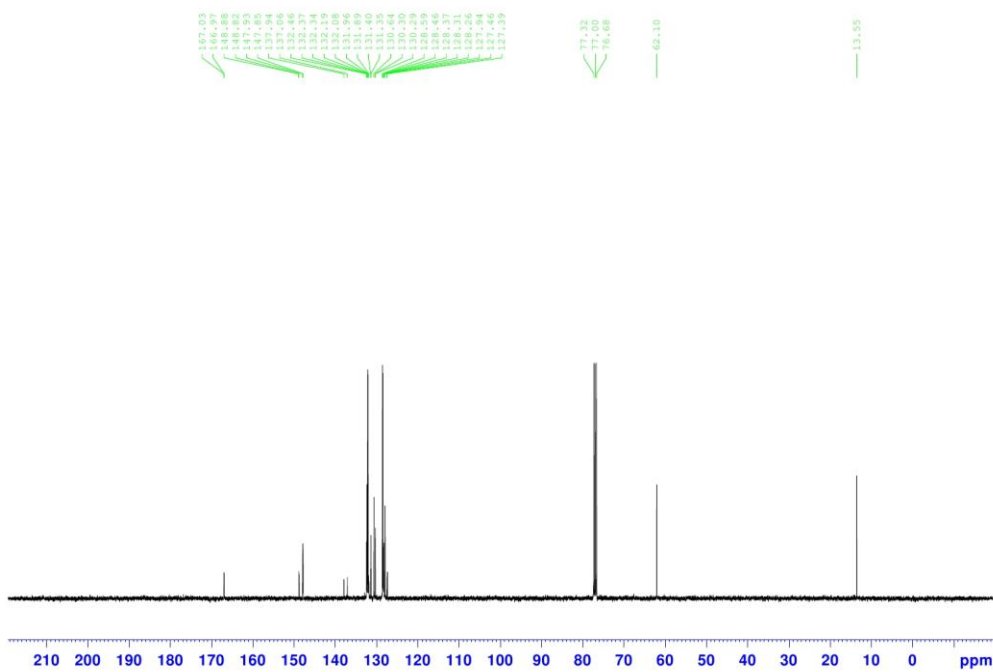

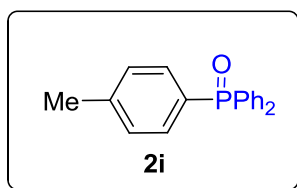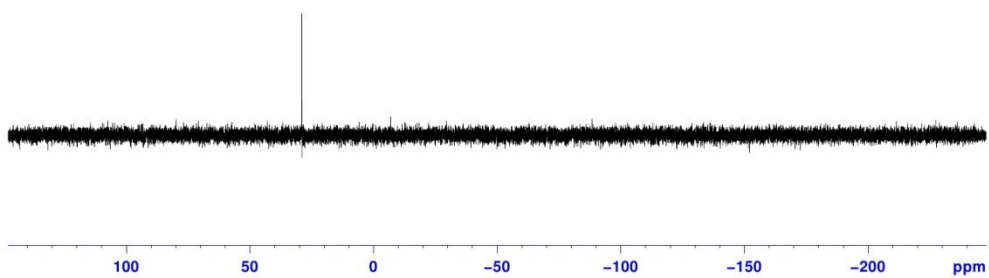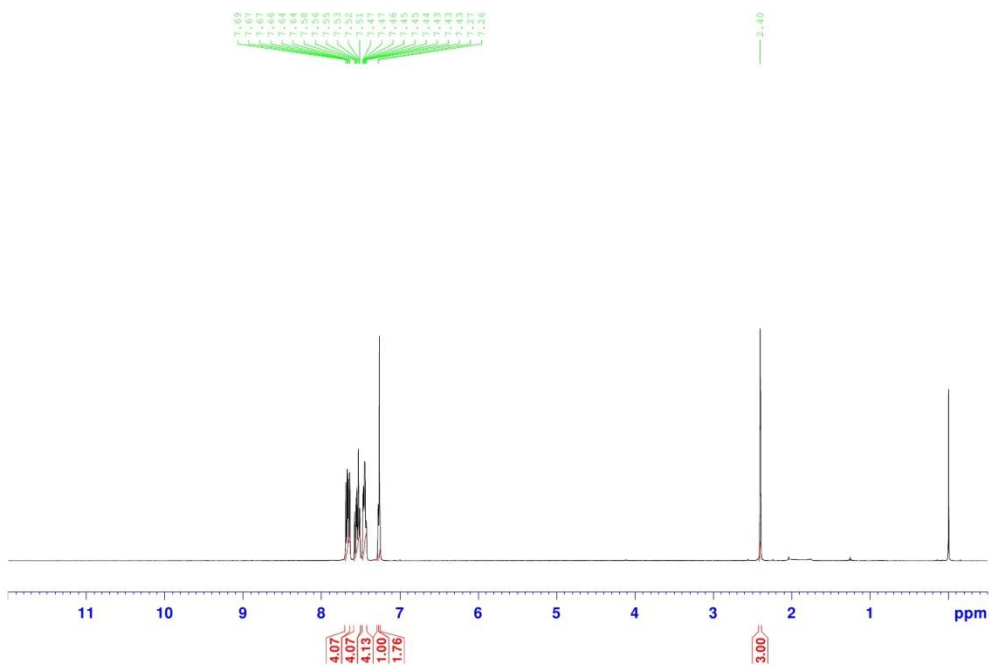

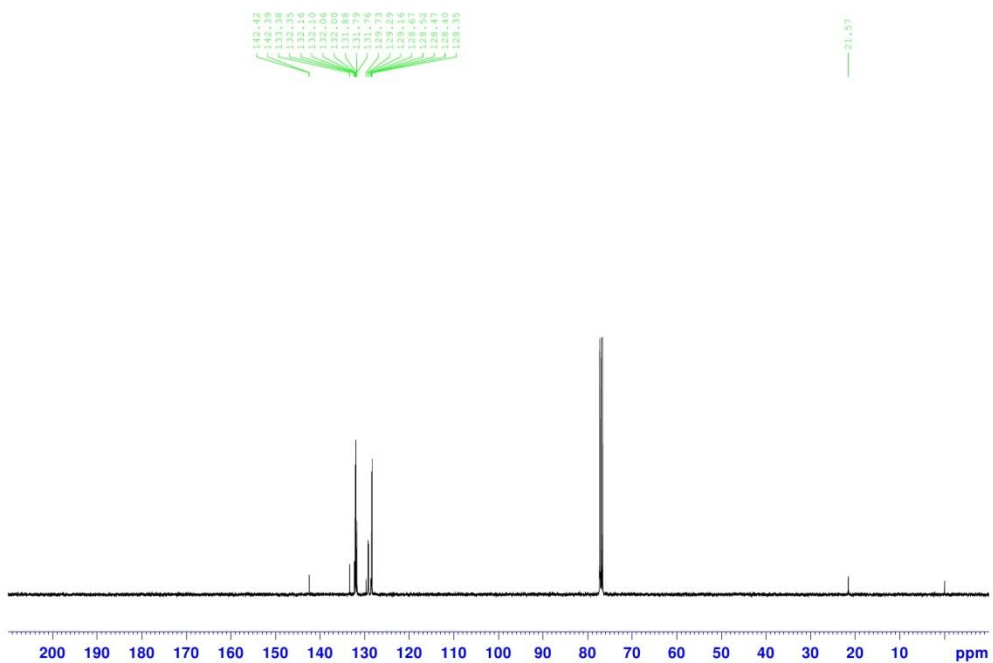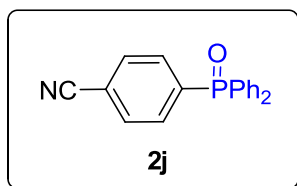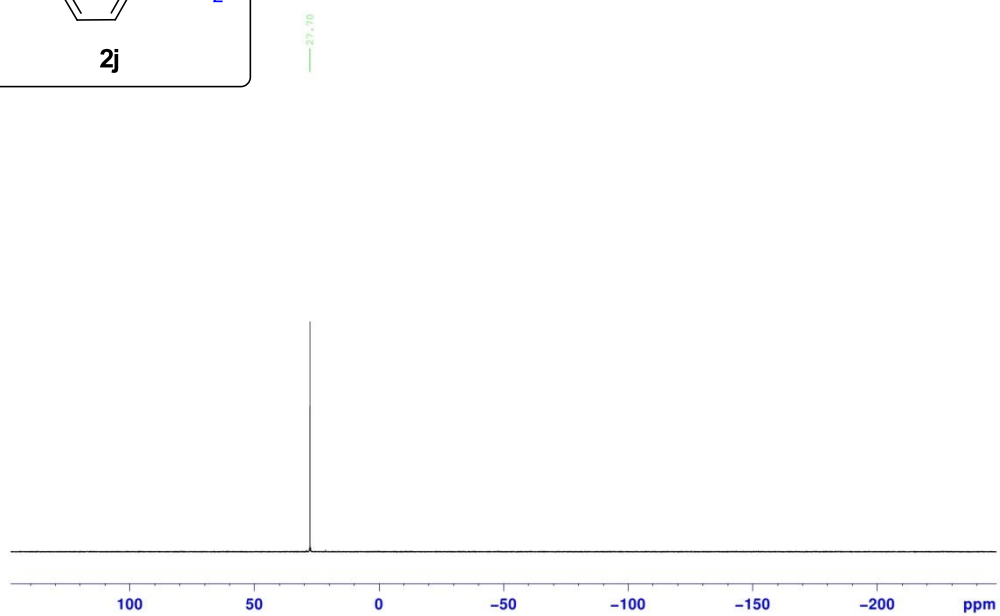

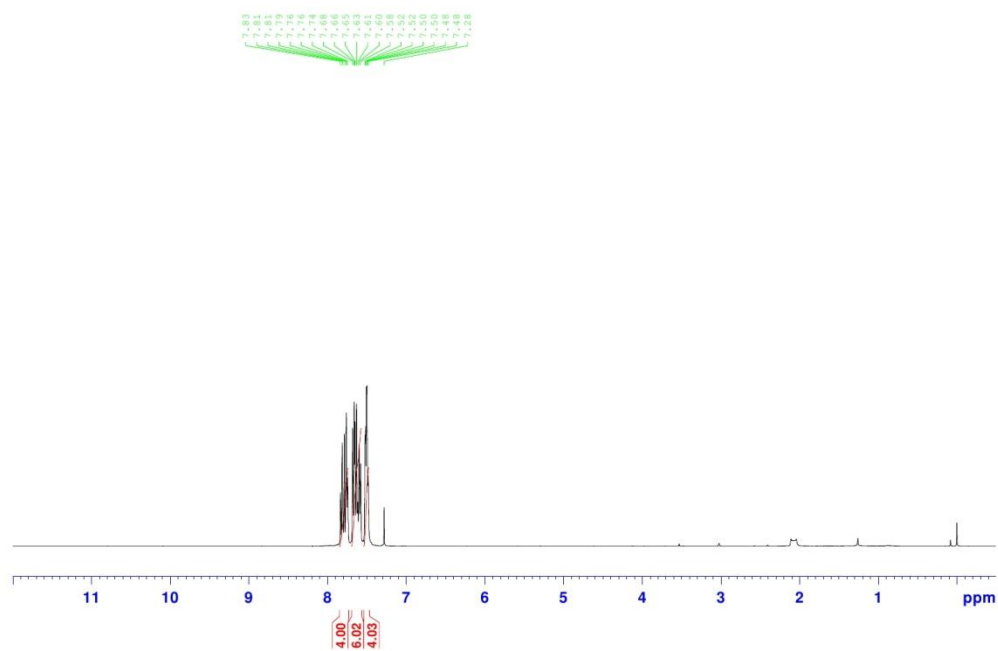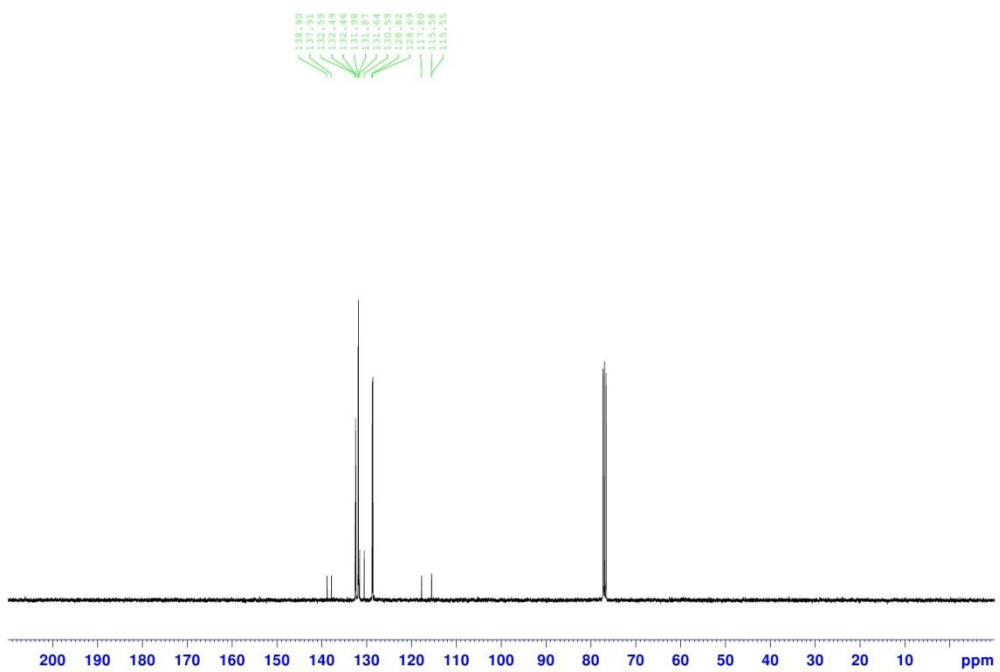

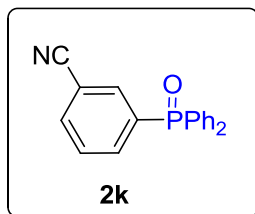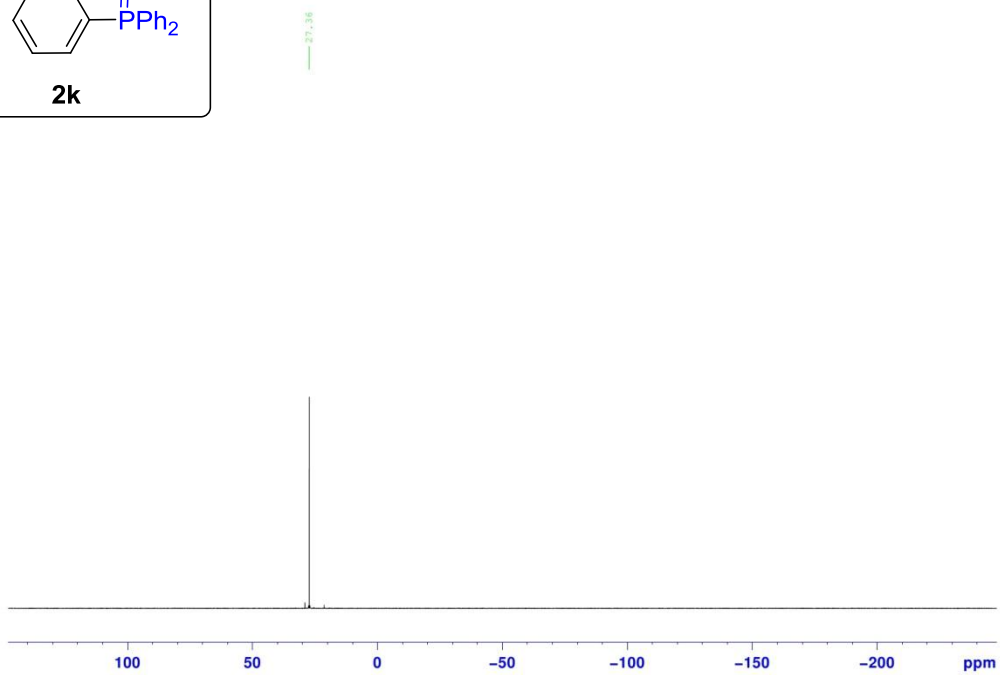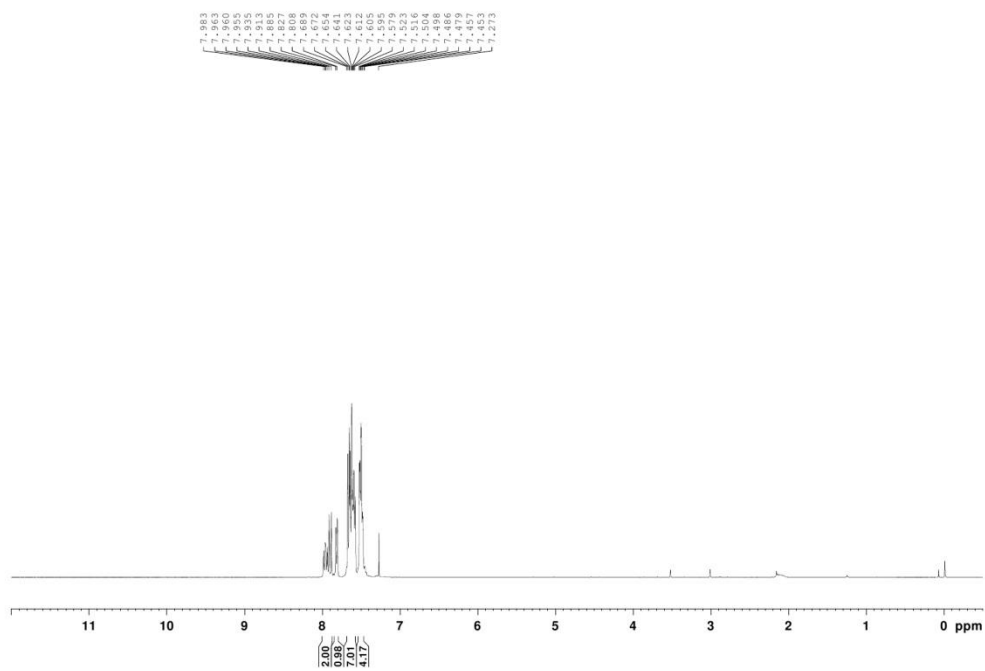



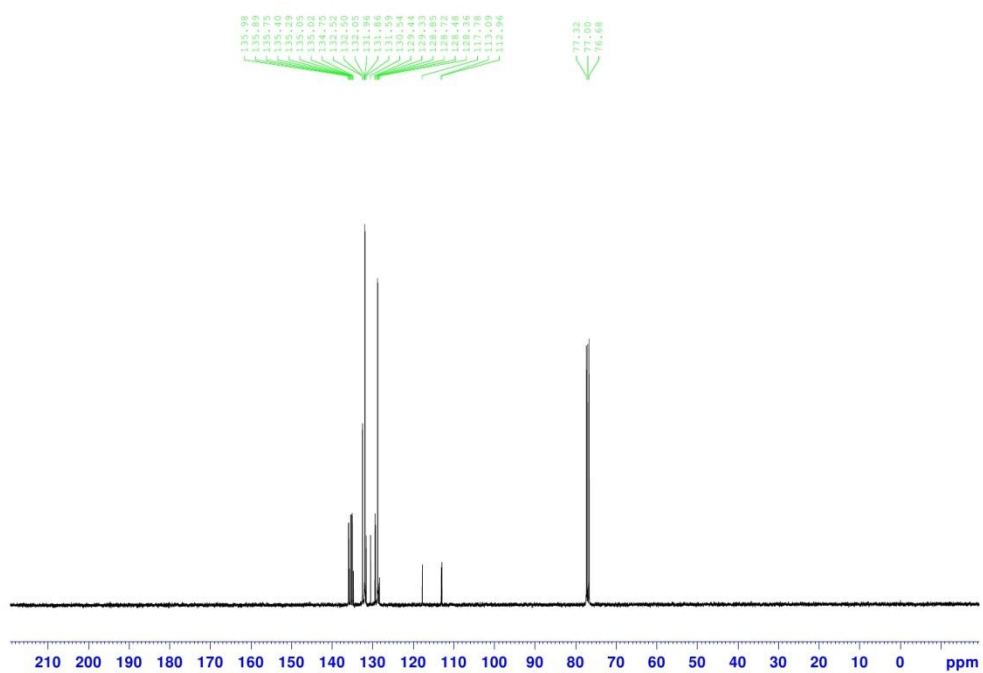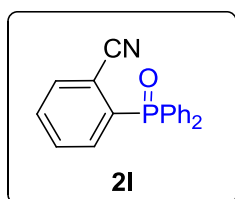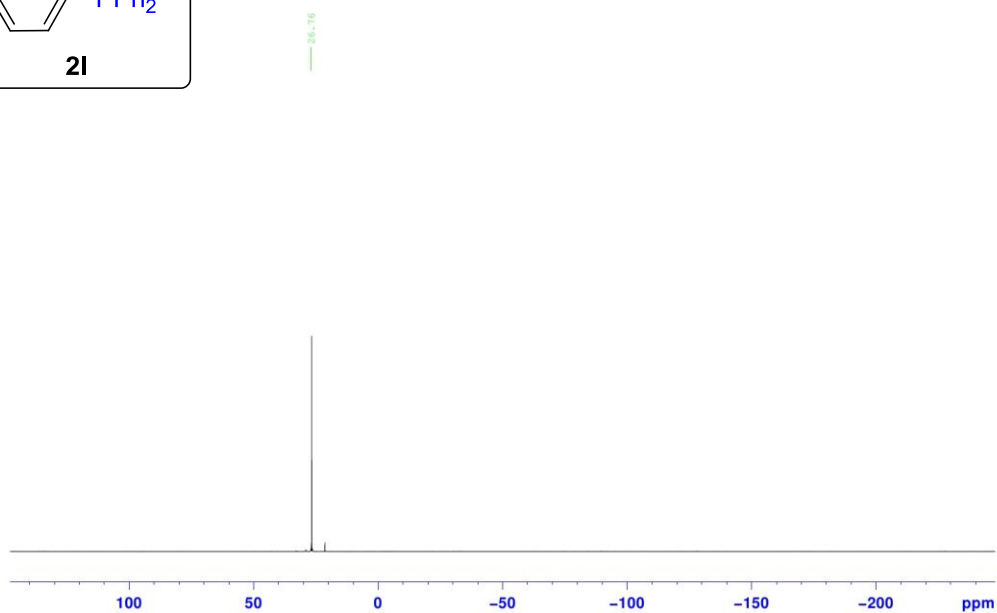

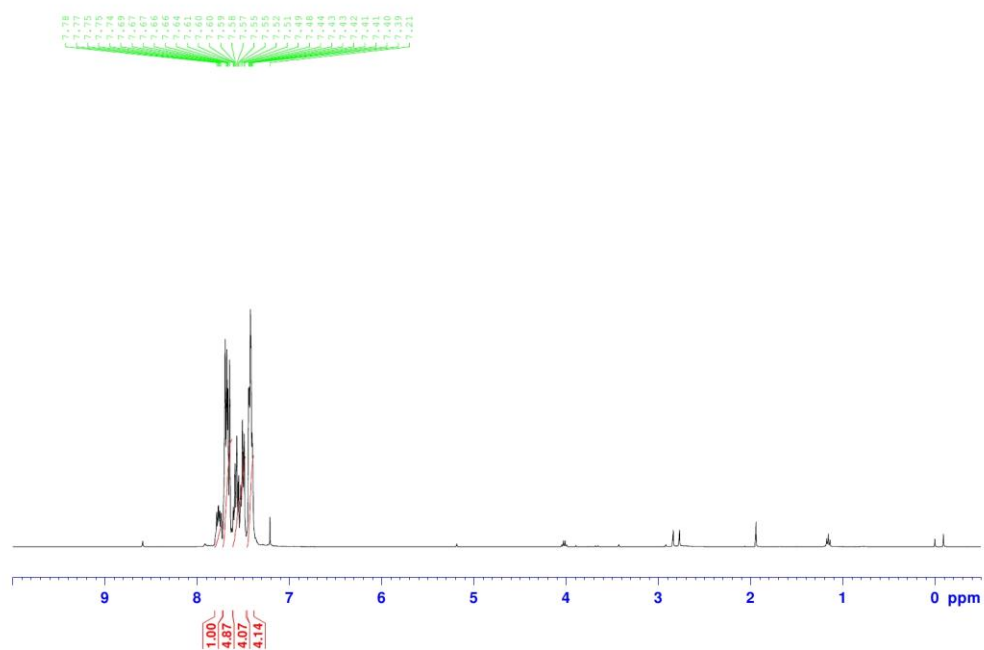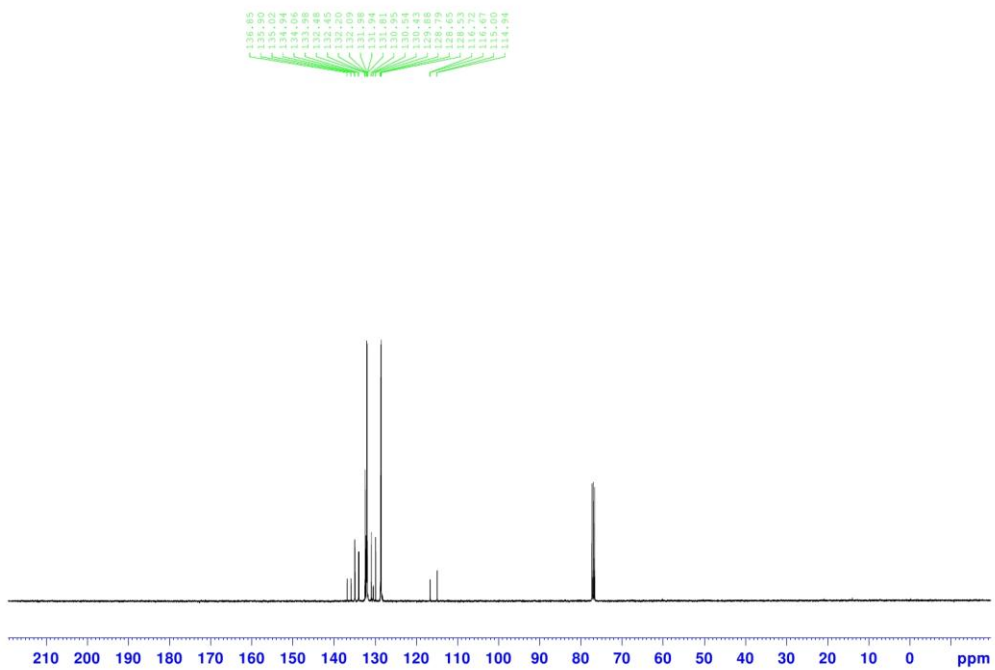

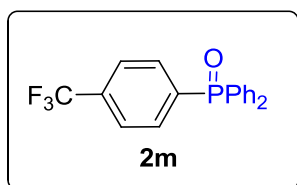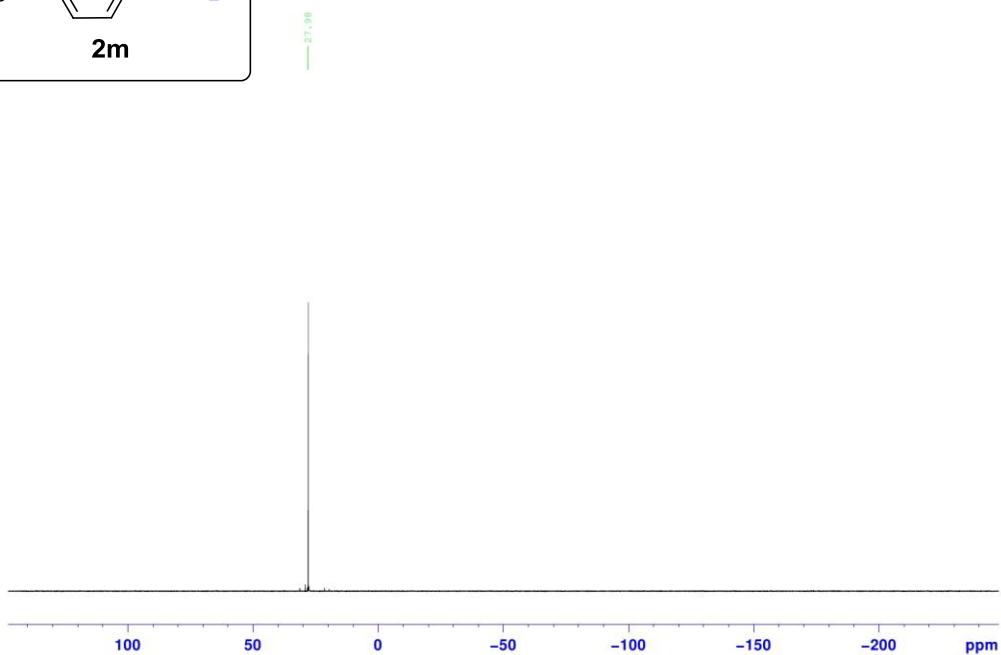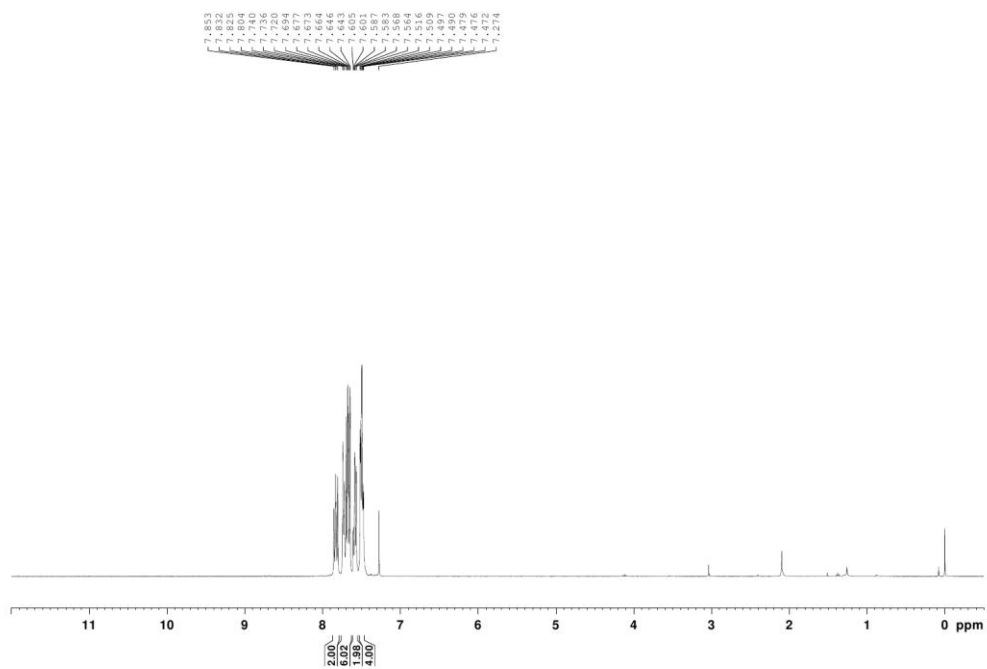

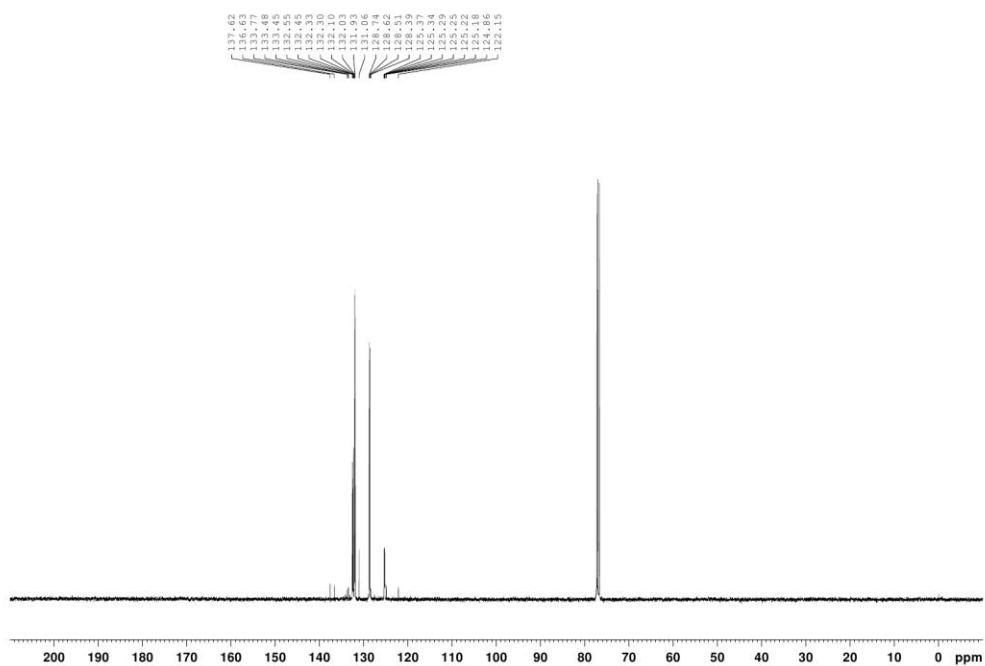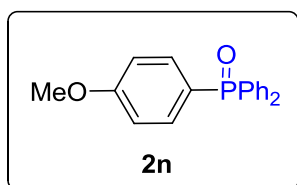

— 0.02

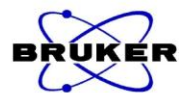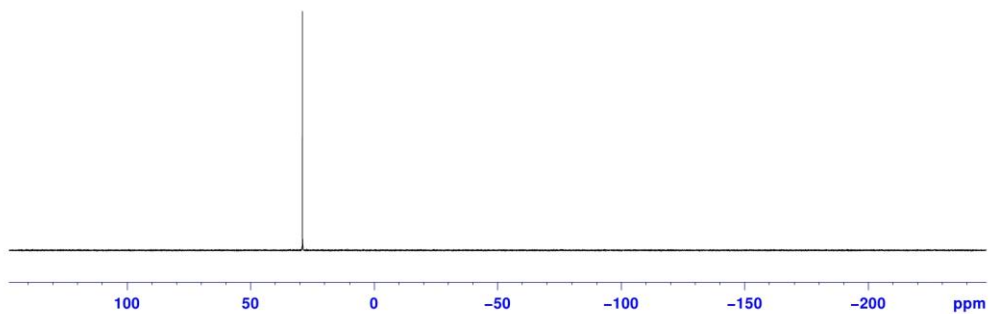

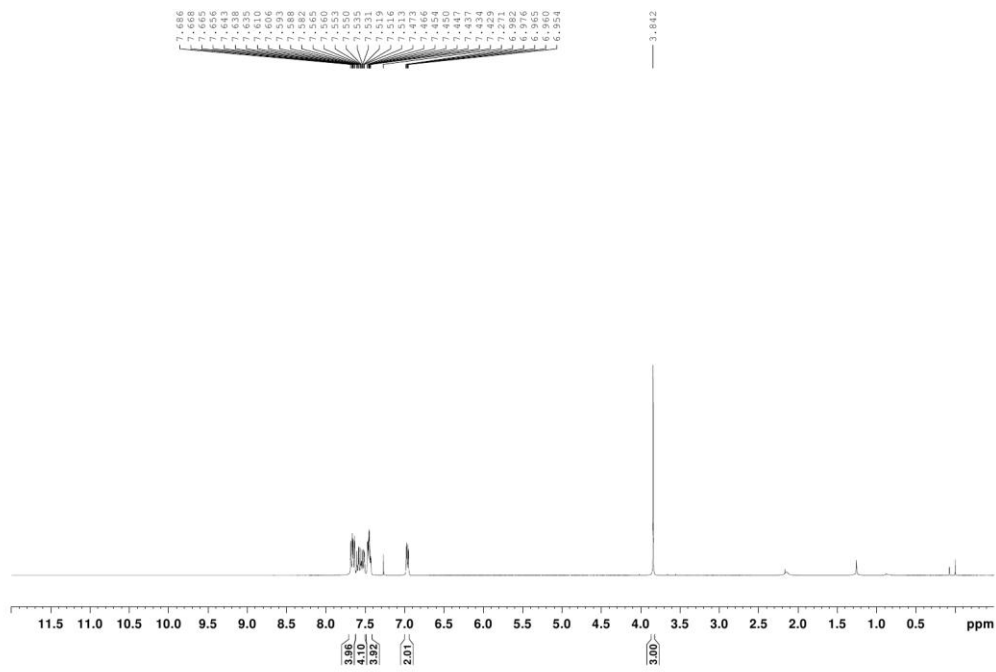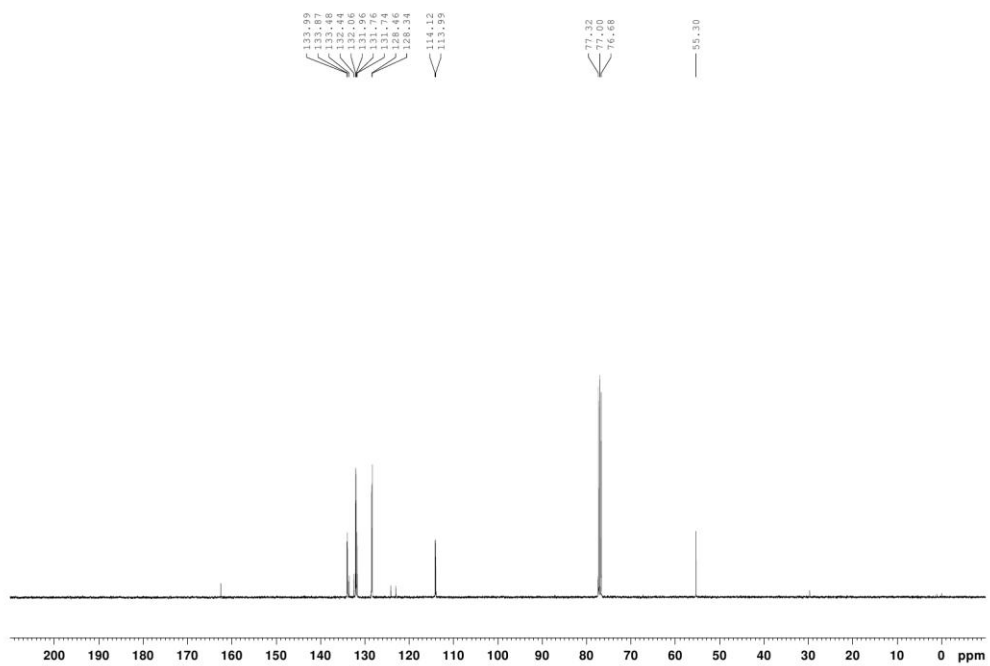

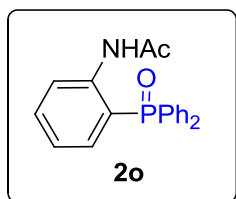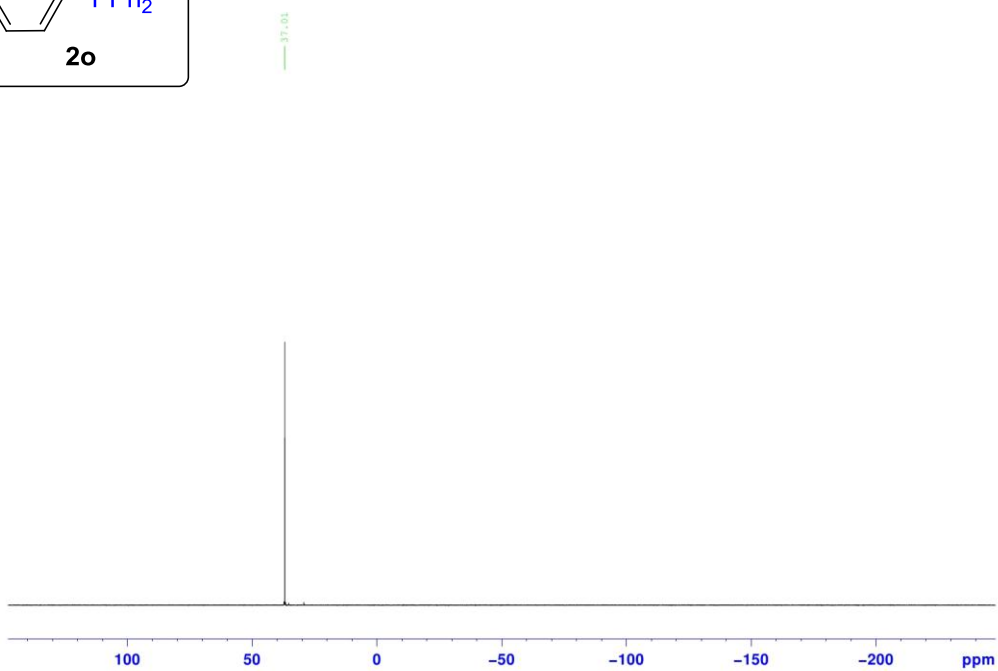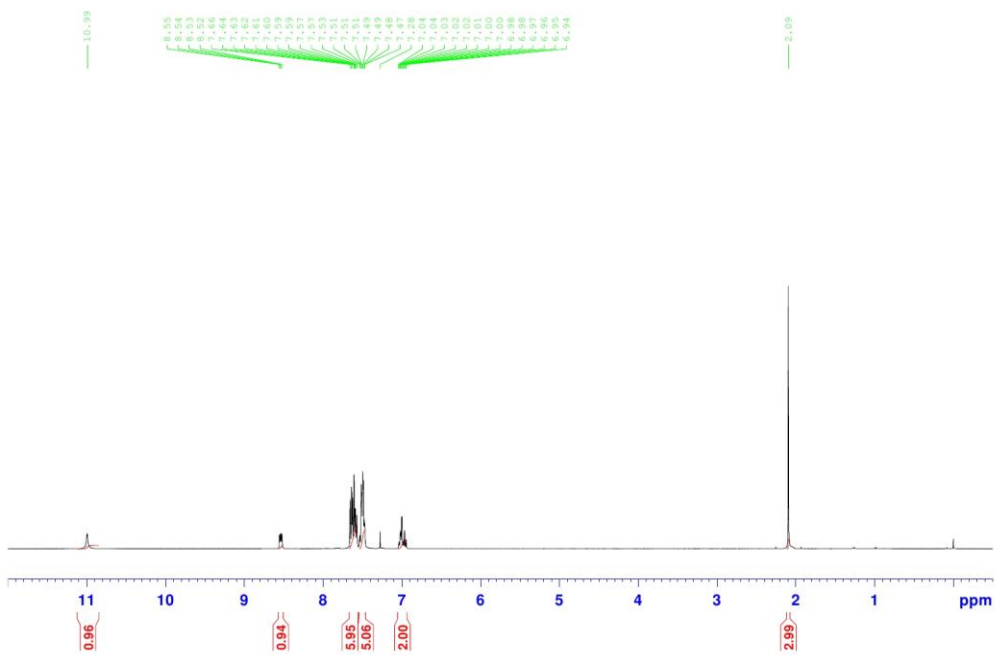

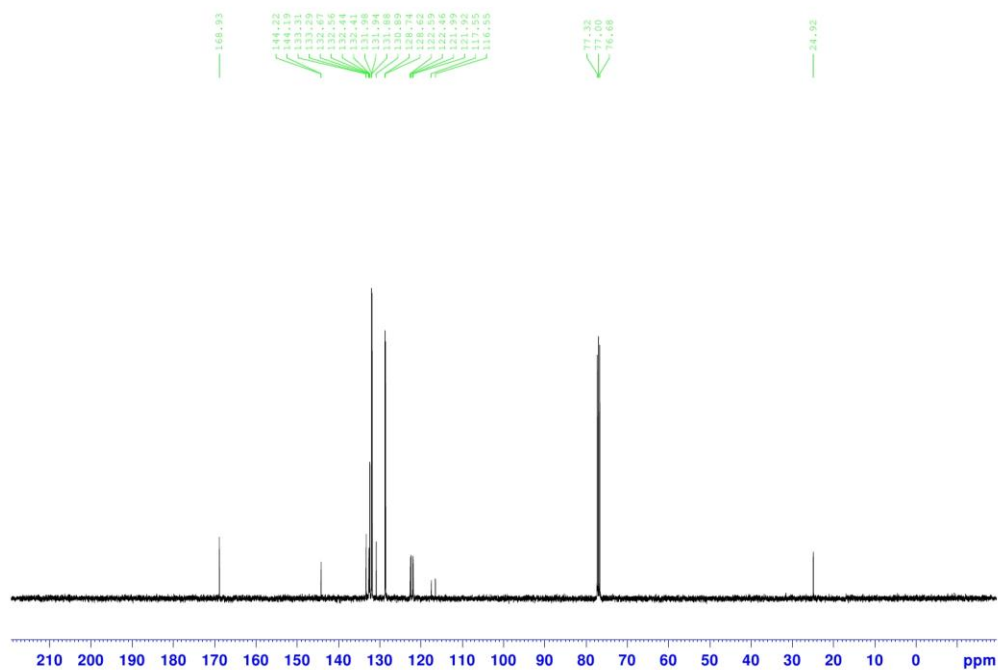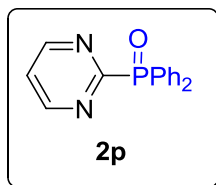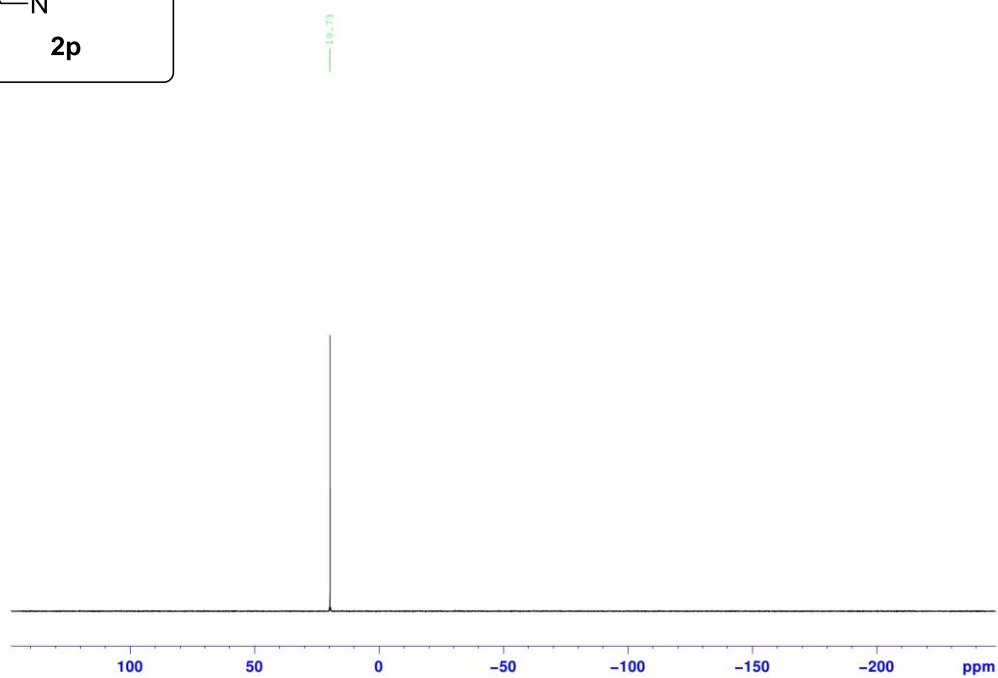

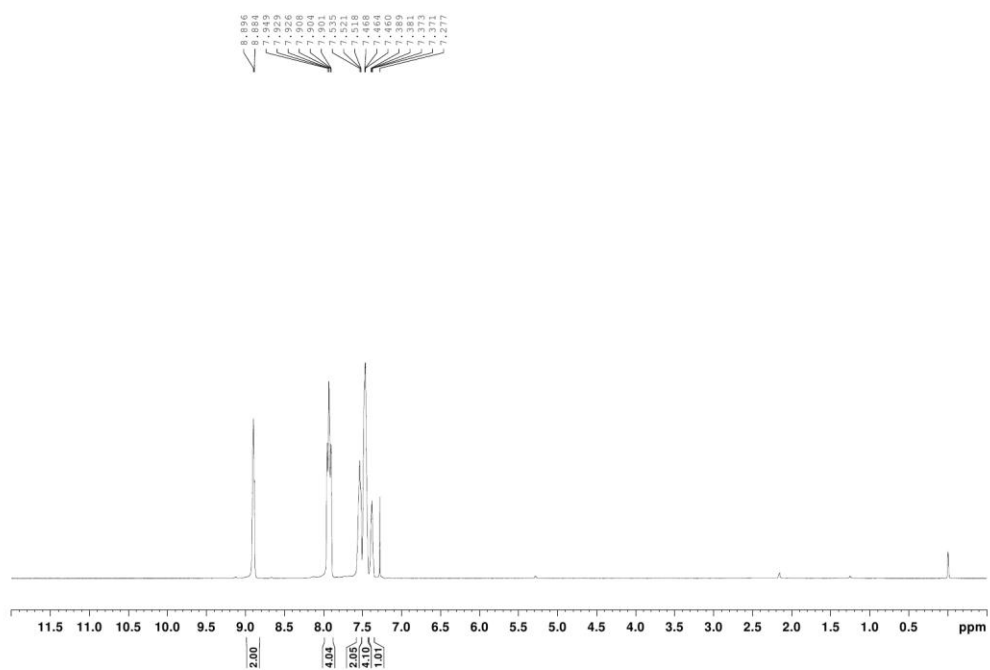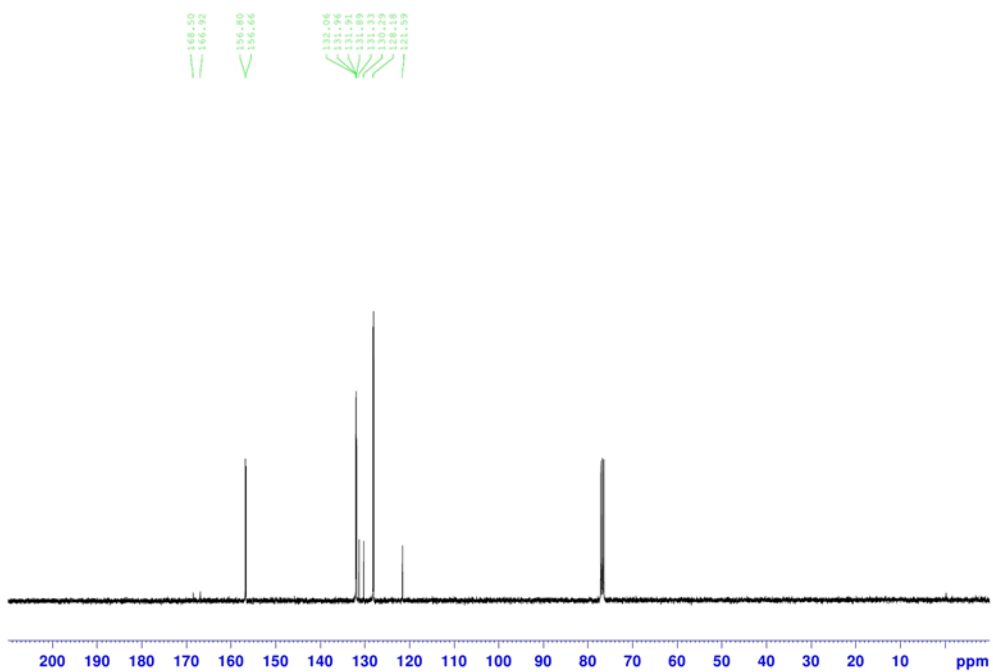



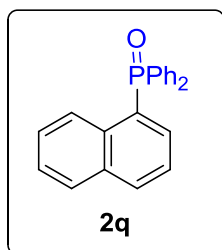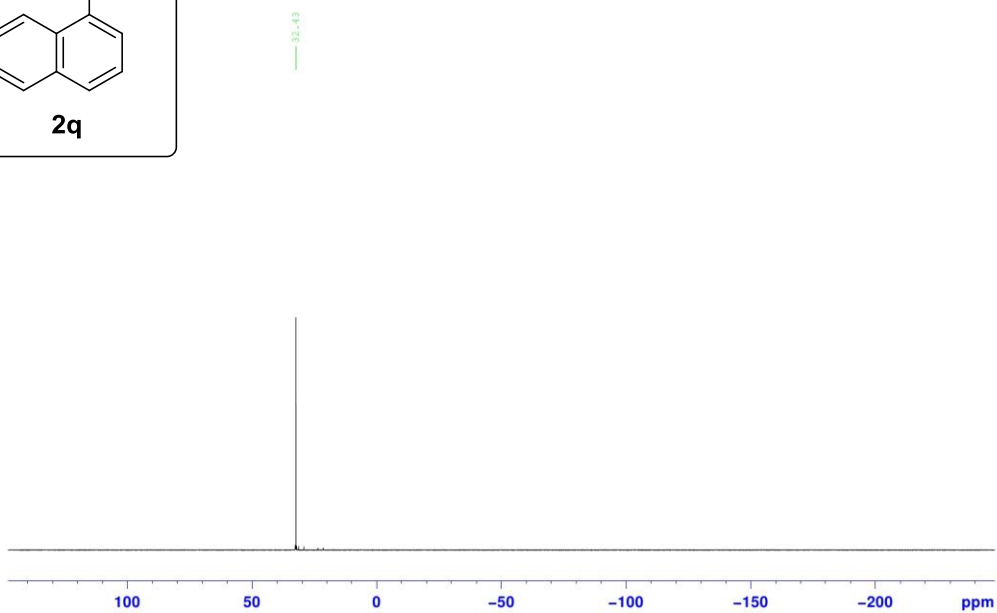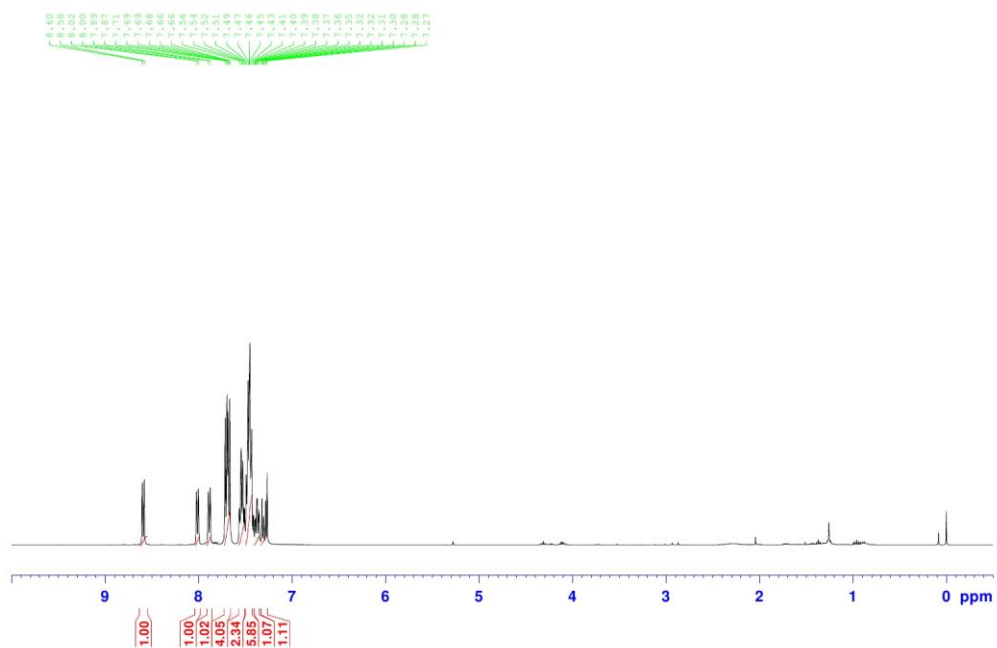

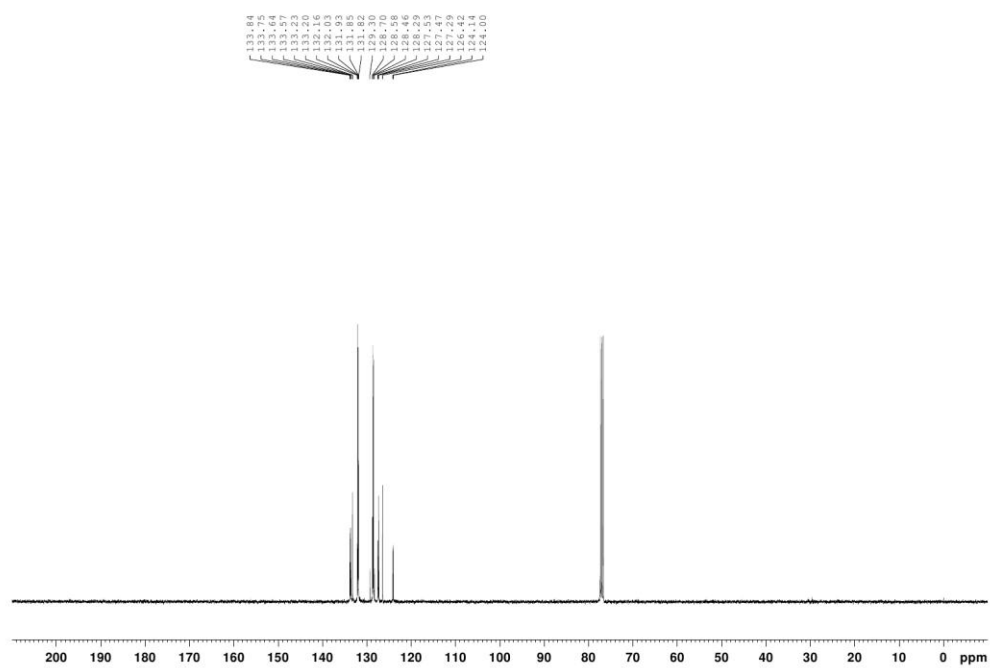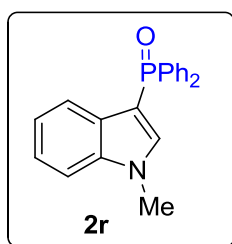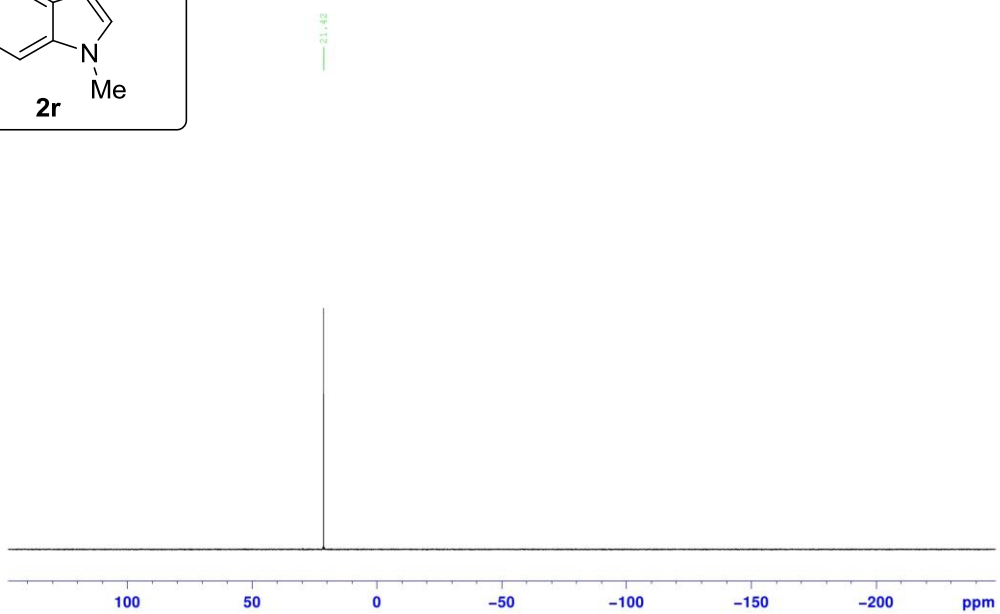

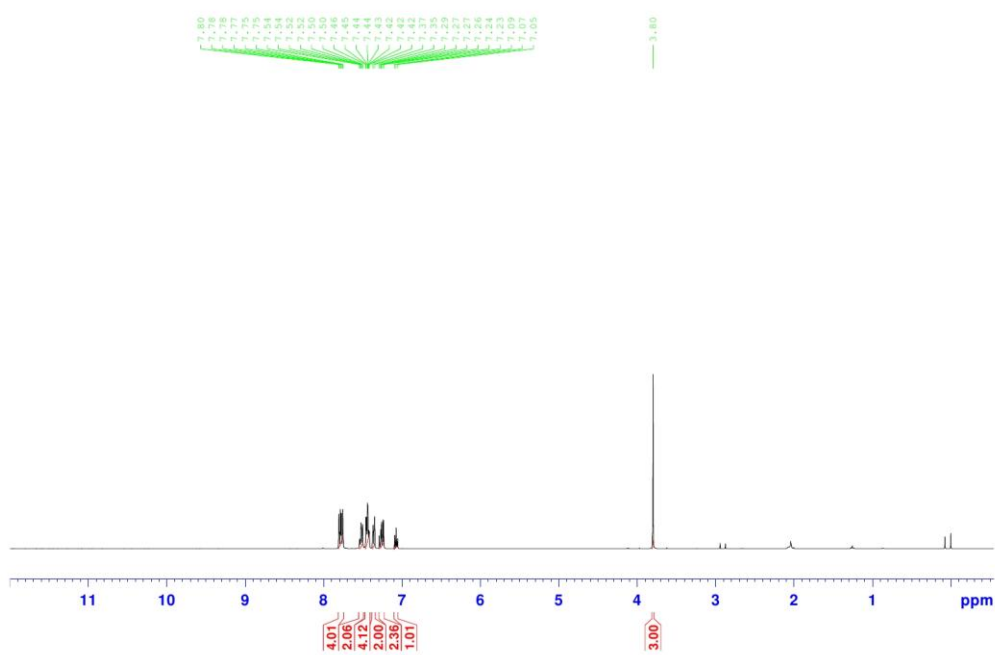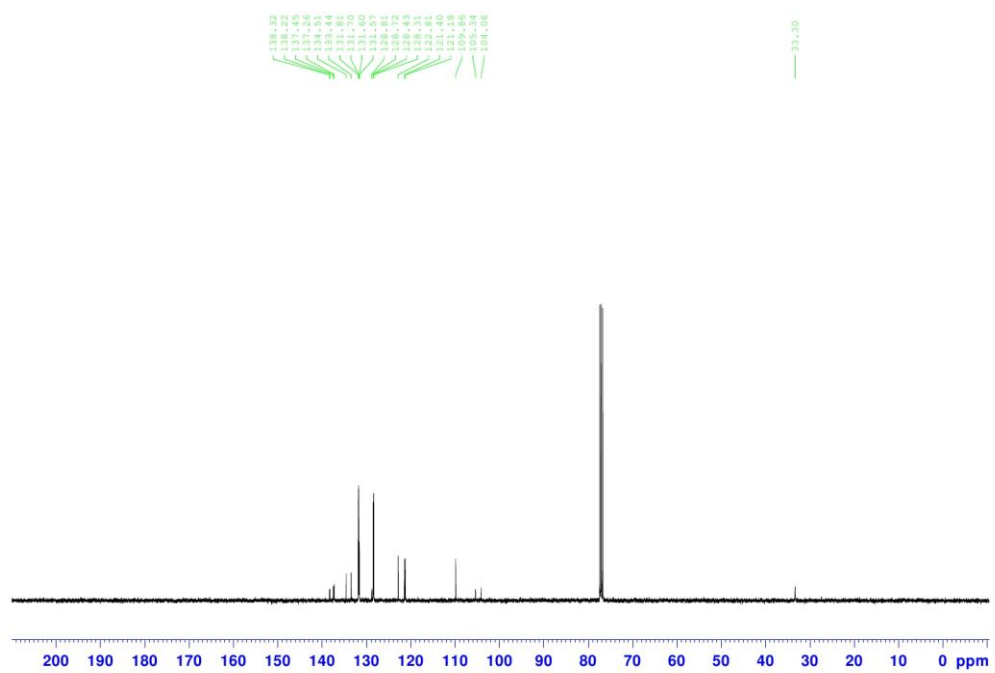

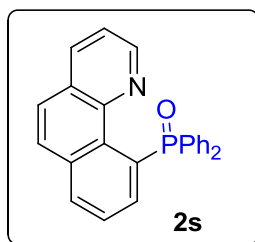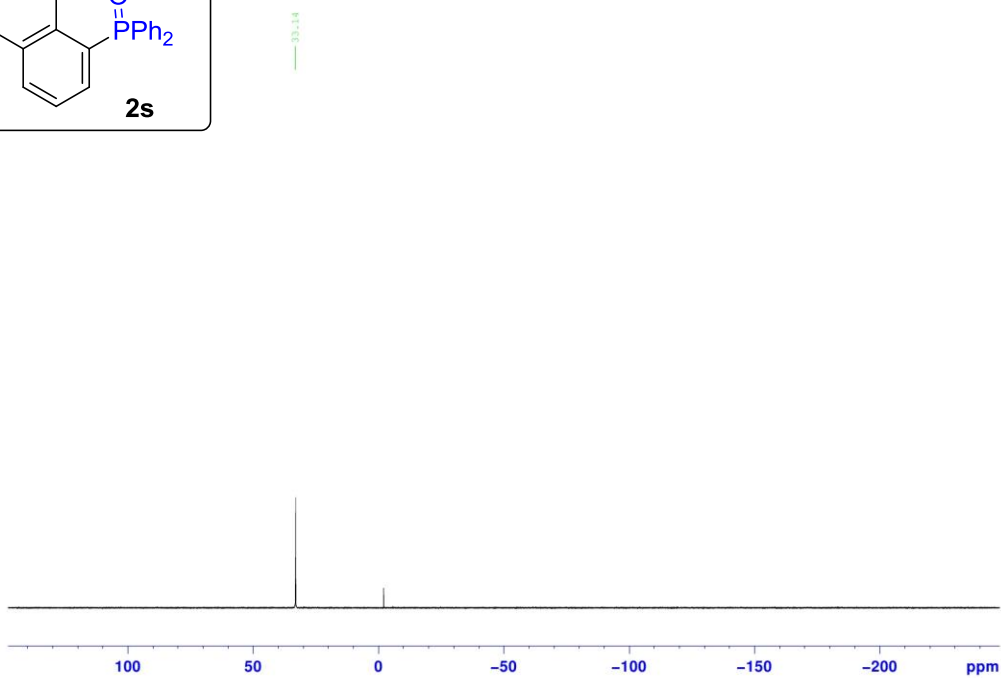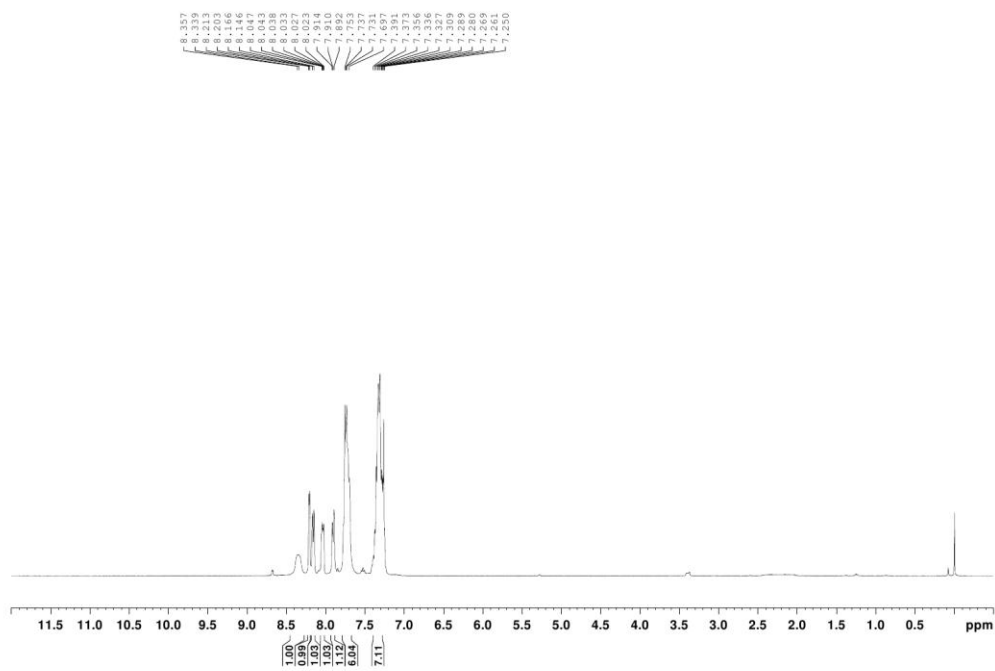

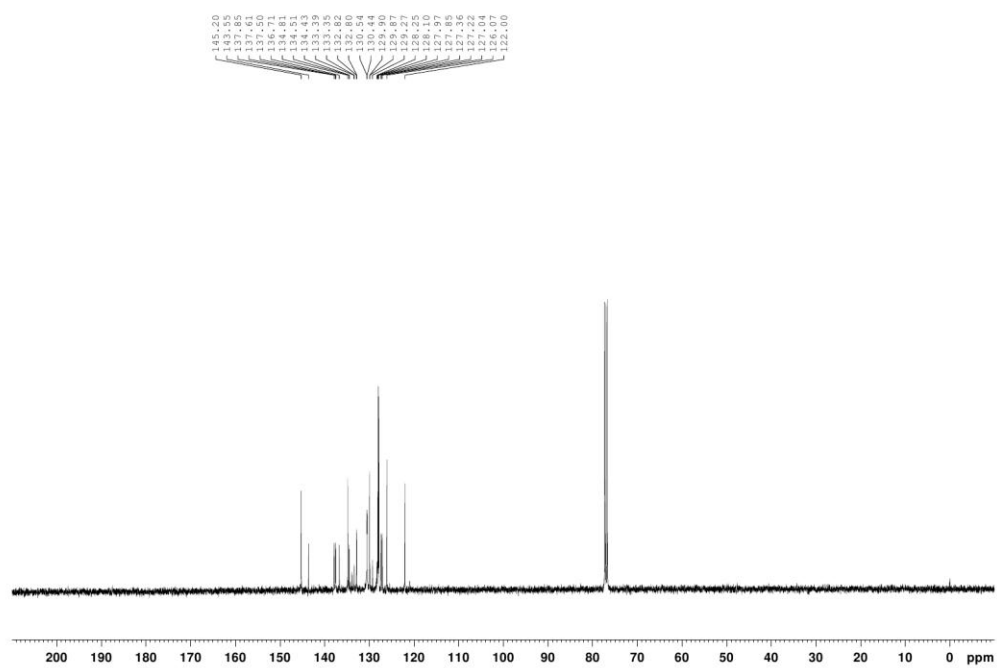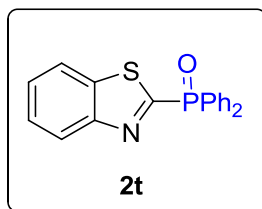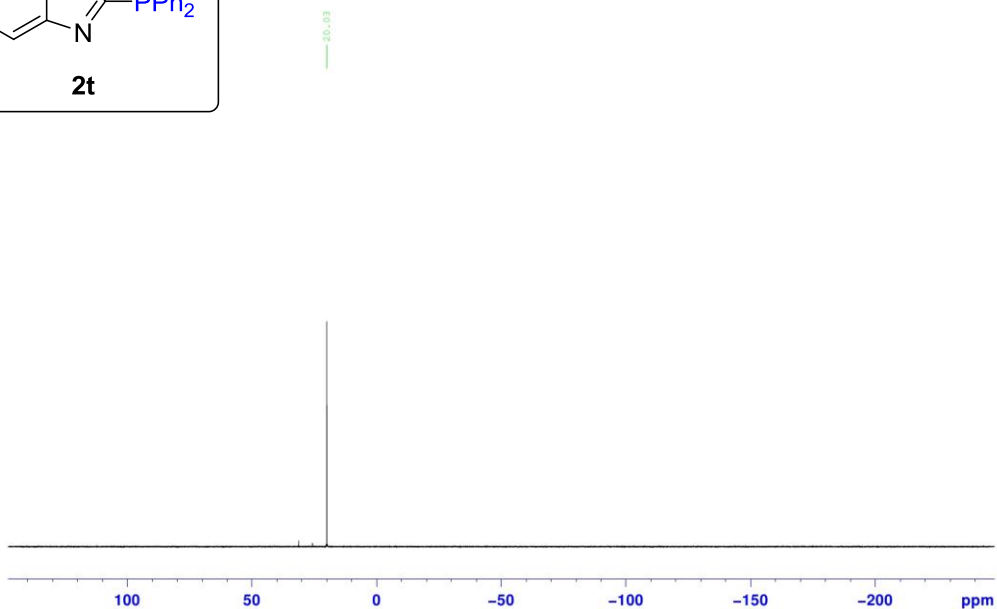

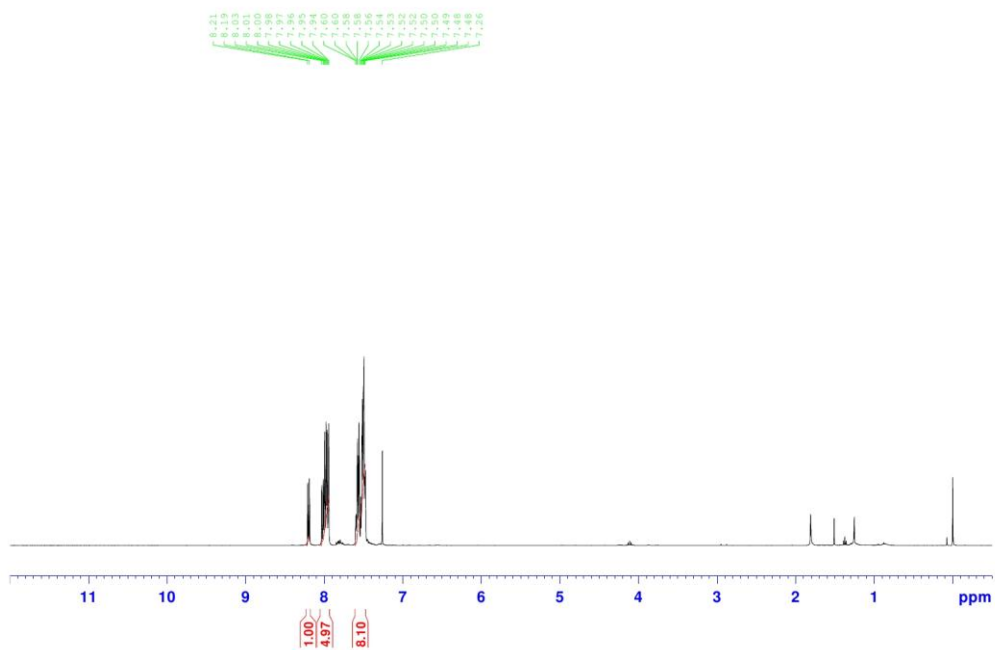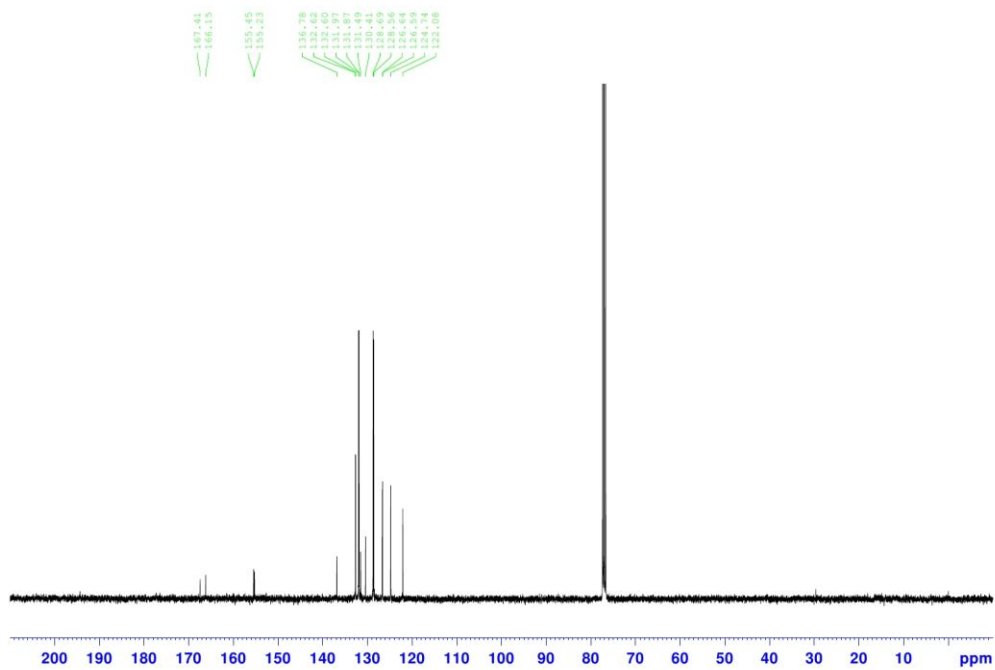

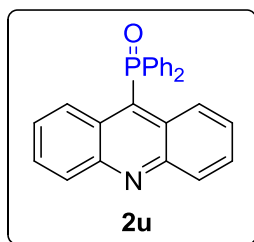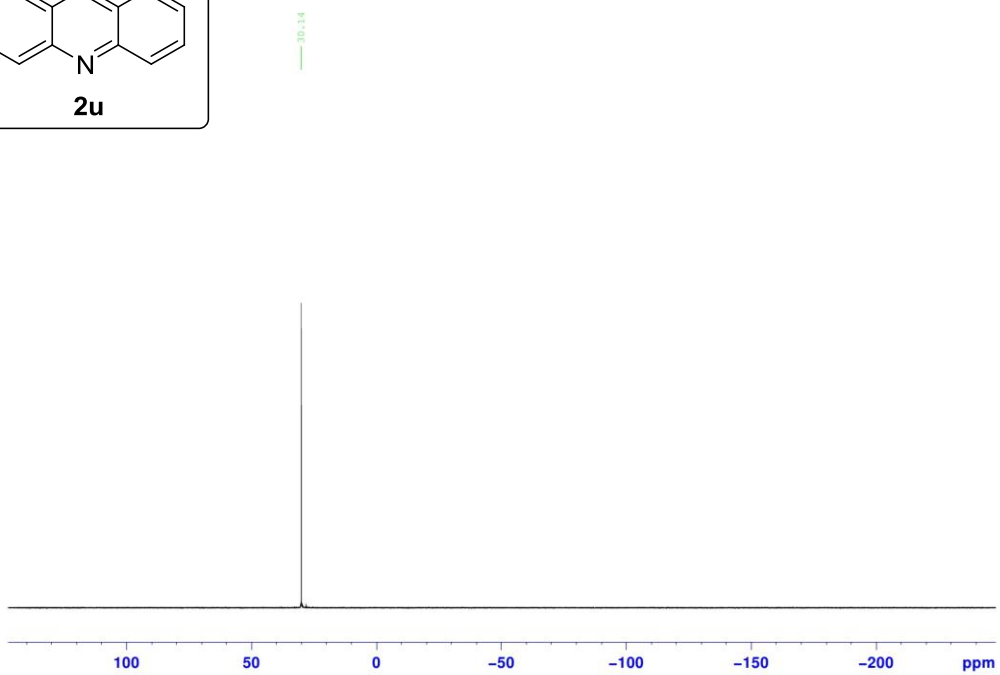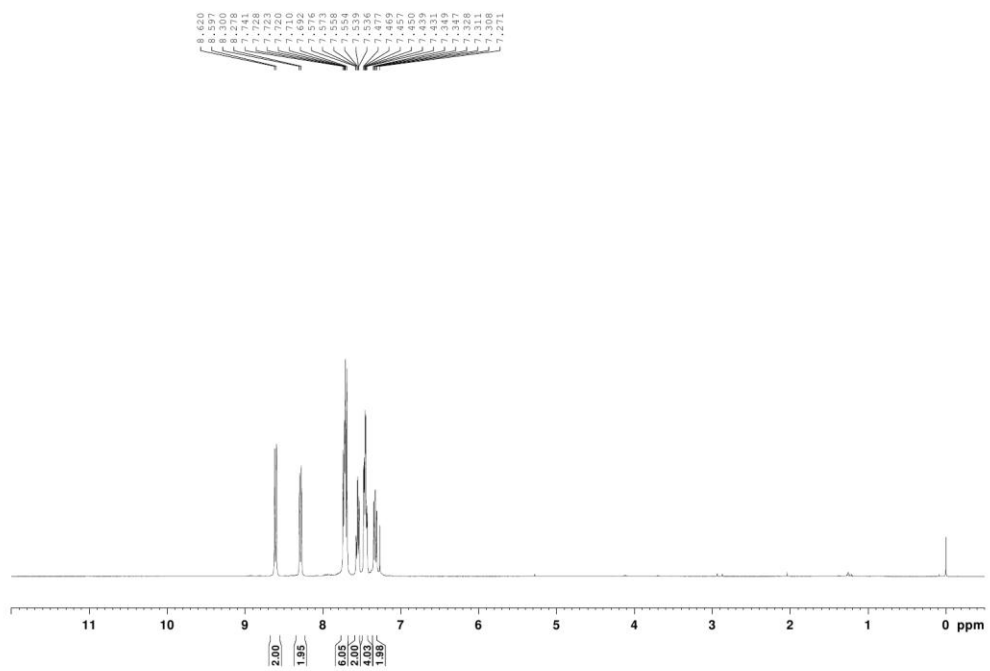

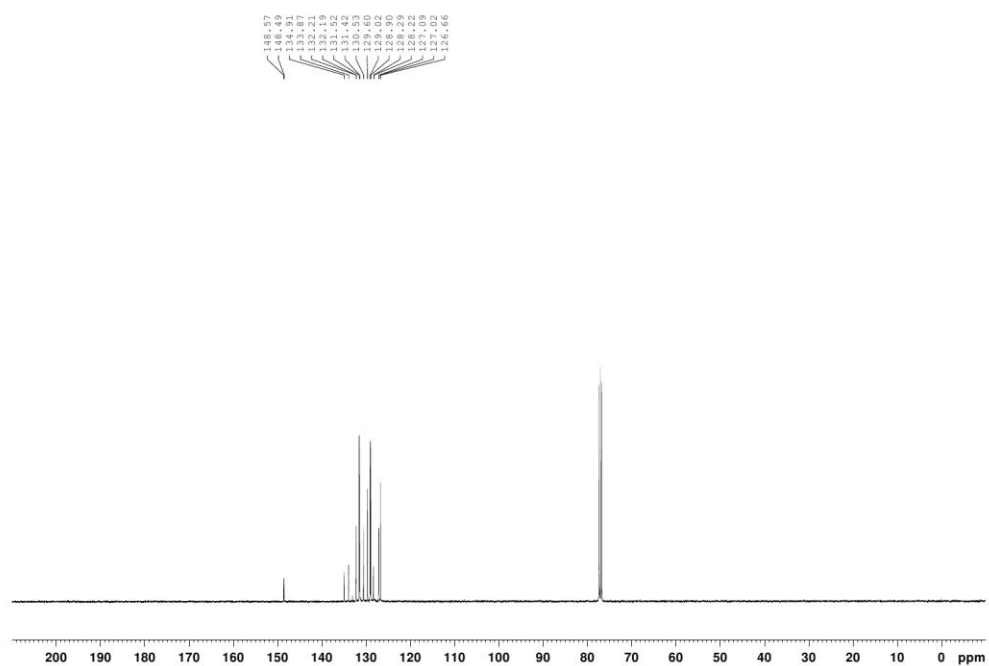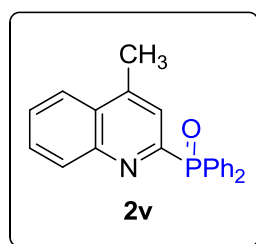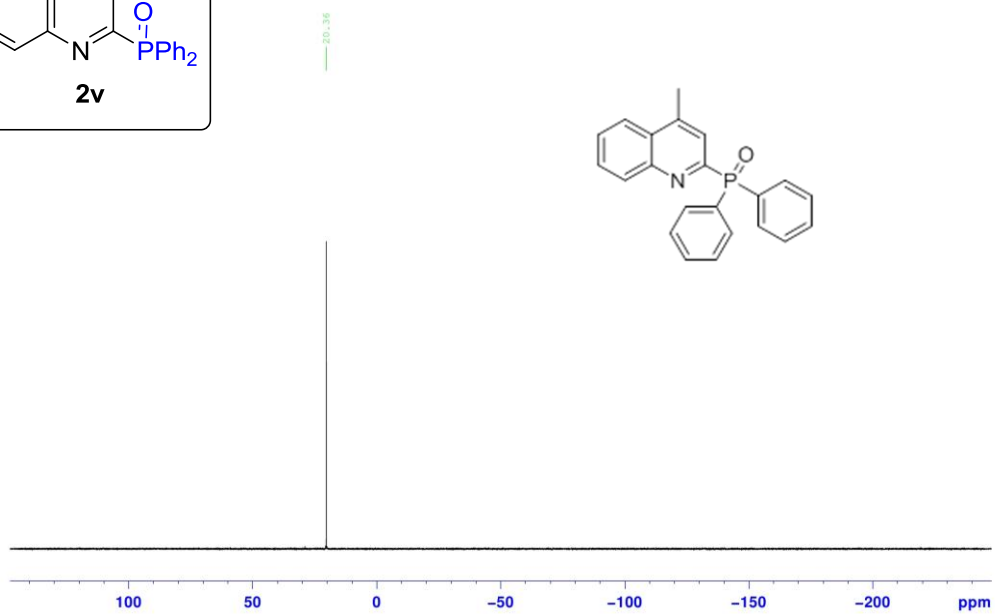



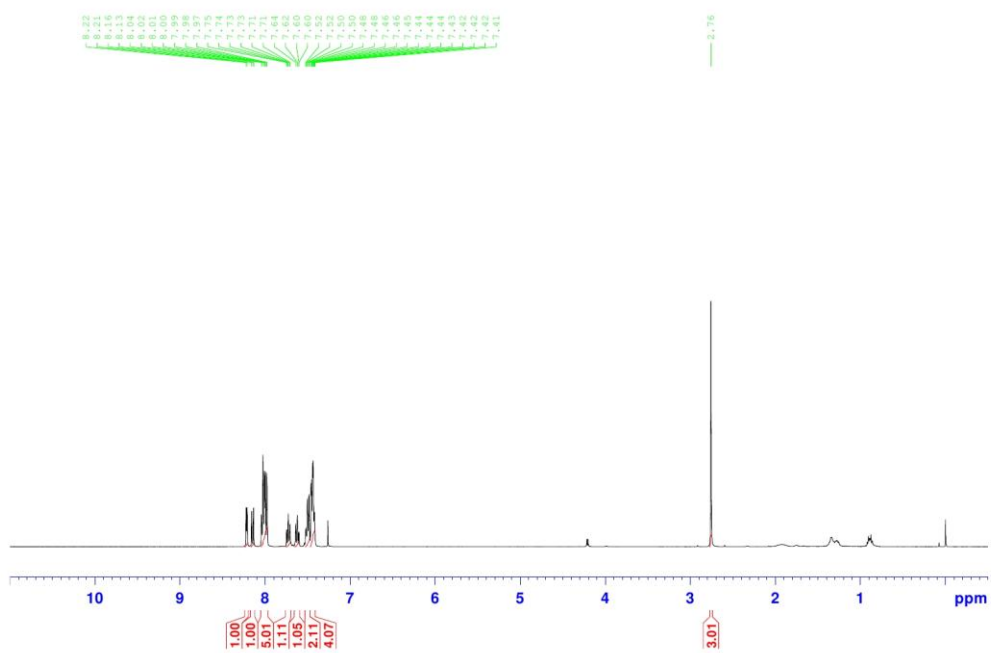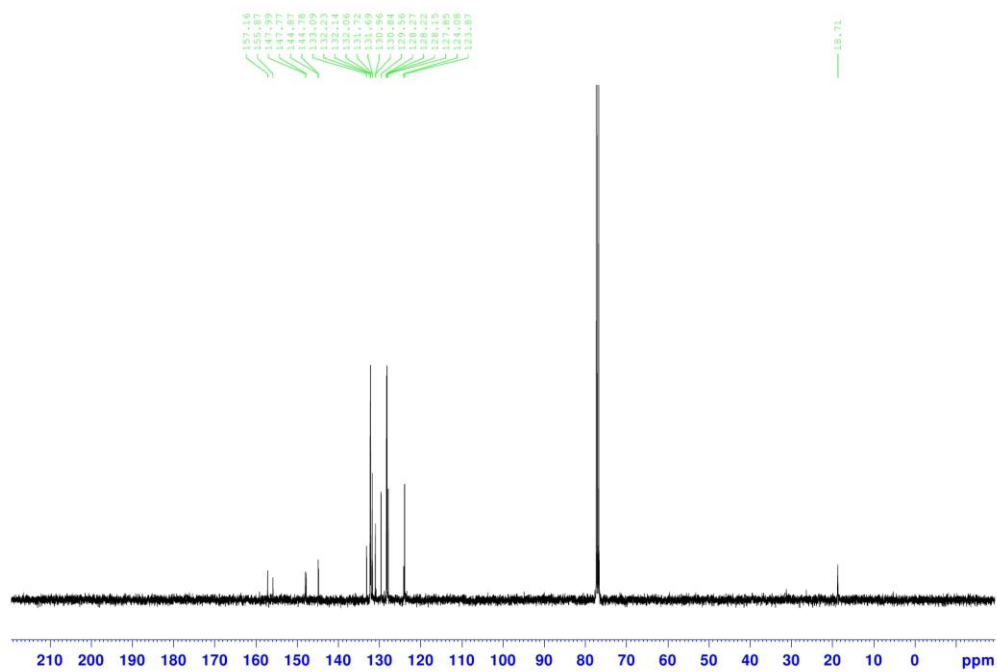

Supplement: c2ob26874d.pdf [file c2ob26874d.pdf]
